# Supplementary material for: Mononuclear and dinuclear gold(i) complexes with a caffeine-based di(N-heterocyclic carbene) ligand: synthesis, reactivity and structural DFT analysis
Source: Royal Society of Chemistry journal article supplement (doi:10.1039/d0nj05906d), 2020-12-24
Supplement: d0nj05906d1.pdf [file d0nj05906d1.pdf]

Supporting Information for

## Mononuclear and dinuclear gold(I) complexes with a caffeine-based di(*N*-heterocyclic carbene) ligand: synthesis, reactivity and structural DFT analysis

Valentina Stoppa,<sup>a</sup> Thomas Scattolin,<sup>b‡</sup> Matteo Bevilacqua,<sup>a</sup> Marco Baron,<sup>a</sup> Claudia Graiff,<sup>c</sup> Laura Orian,<sup>a</sup> Andrea Biffis,<sup>\*a</sup> Ileana Menegazzo,<sup>a</sup> Marco Roverso,<sup>a</sup> Sara Bogialli,<sup>a</sup> Fabiano Visentin,<sup>\*b</sup> and Cristina Tubaro<sup>\*a</sup>

<sup>a</sup> Dipartimento di Scienze Chimiche, Università degli Studi di Padova, via F. Marzolo 1, 35131 Padova, Italy

<sup>b</sup> Dipartimento di Scienze Molecolari e Nanosistemi, Università Ca' Foscari, Campus Scientifico Via Torino 155, 30174 Venezia-Mestre (Italy).

<sup>c</sup> Dipartimento di Scienze Chimiche, della Vita e della Sostenibilità Ambientale, Università degli Studi di Parma, Parco Area delle Scienze 17/A, 43124 Parma, Italy.

<sup>‡</sup> present address: Department of Chemistry and Center for Sustainable Chemistry, Ghent University, Krijgslaan 281 (S-3), 9000, Ghent, Belgium.

### Table of contents

|                                                                                                        |     |
|--------------------------------------------------------------------------------------------------------|-----|
| NMR spectra of the proligand <b>1</b> · <b>2HBF<sub>4</sub></b> .....                                  | S2  |
| NMR and MS spectra of complexes <b>2</b> – <b>5</b> .....                                              | S5  |
| Coordinates of fully optimized molecular structures; level of theory: (COSMO)-ZORA-BLYP-D3(BJ)/TZ2P .. | S14 |

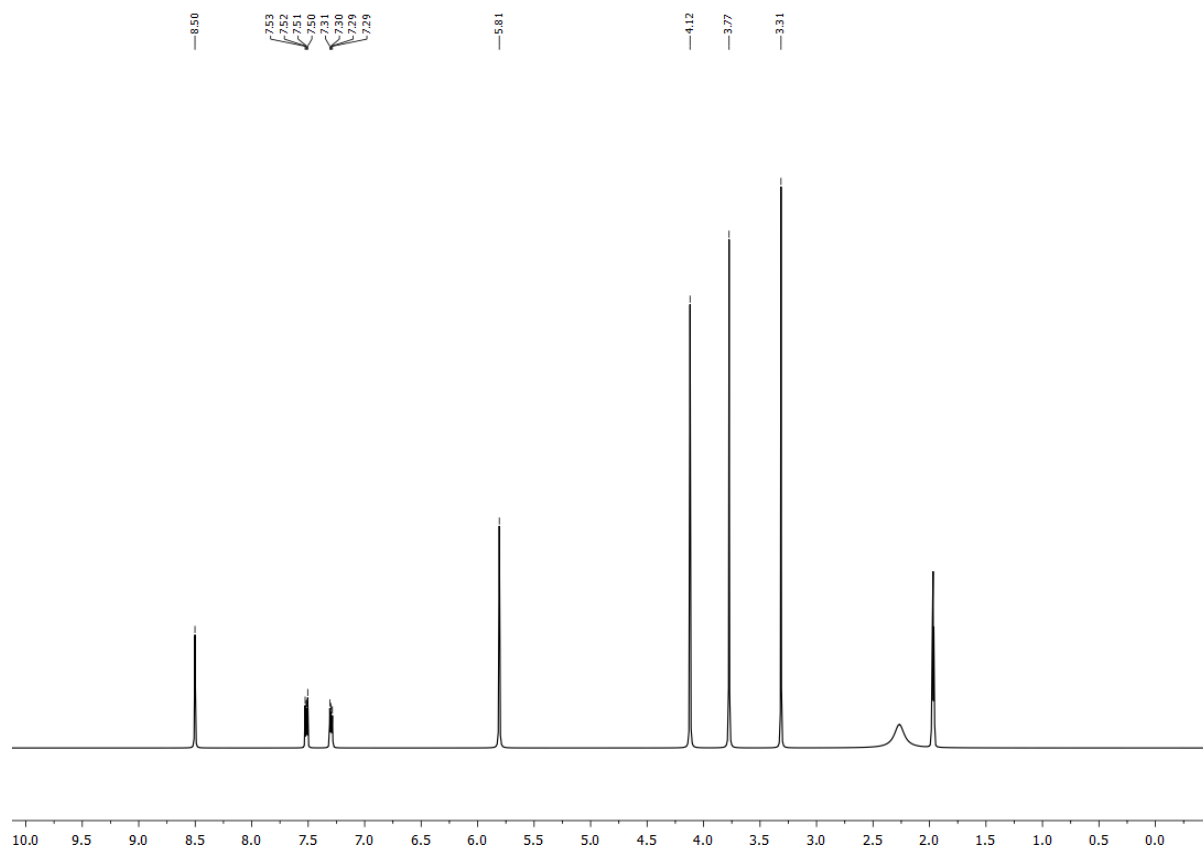

Figure S1.  $^1\text{H}$  NMR spectrum of  $\mathbf{1}\cdot\mathbf{2HBF}_4$  in  $\text{CD}_3\text{CN}$ .

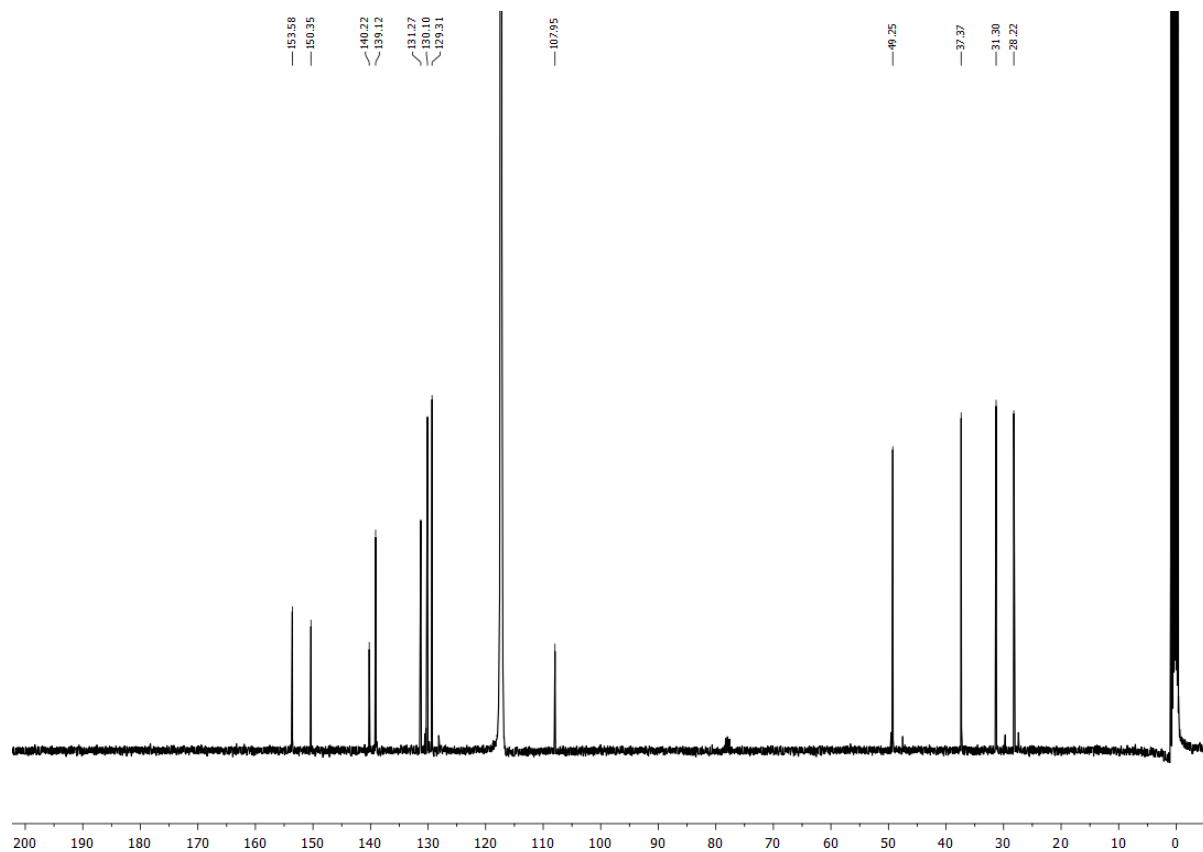

Figure S2.  $^{13}\text{C}\{^1\text{H}\}$  NMR spectrum of  $\mathbf{1}\cdot\mathbf{2HBF}_4$  in  $\text{CD}_3\text{CN}$ .

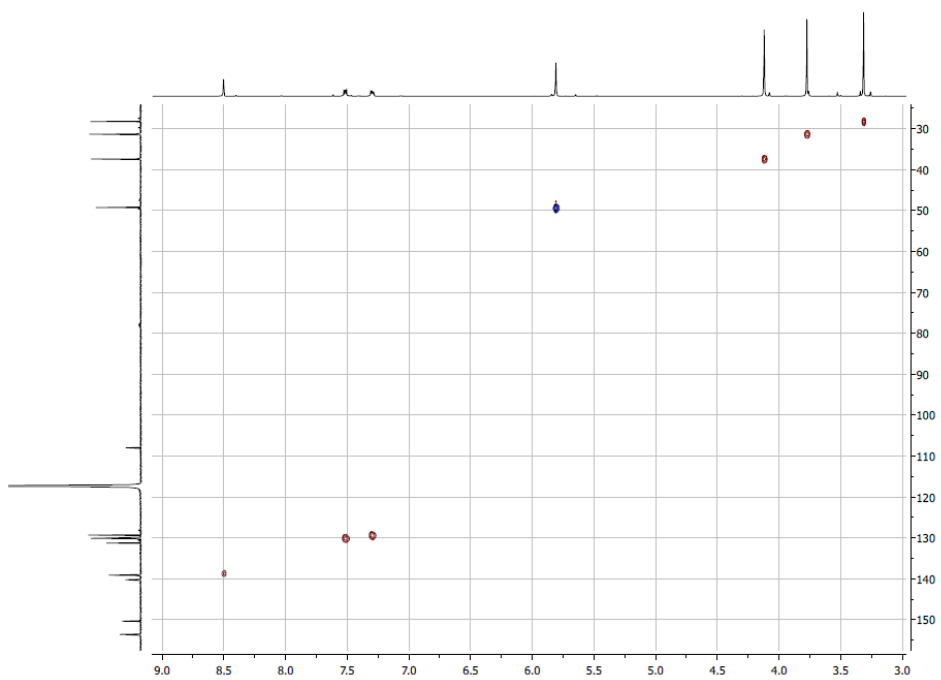

Figure S3.  $^{13}\text{C},^1\text{H}$ -HSQC spectrum of **1·2HBF<sub>4</sub>** in  $\text{CD}_3\text{CN}$ .

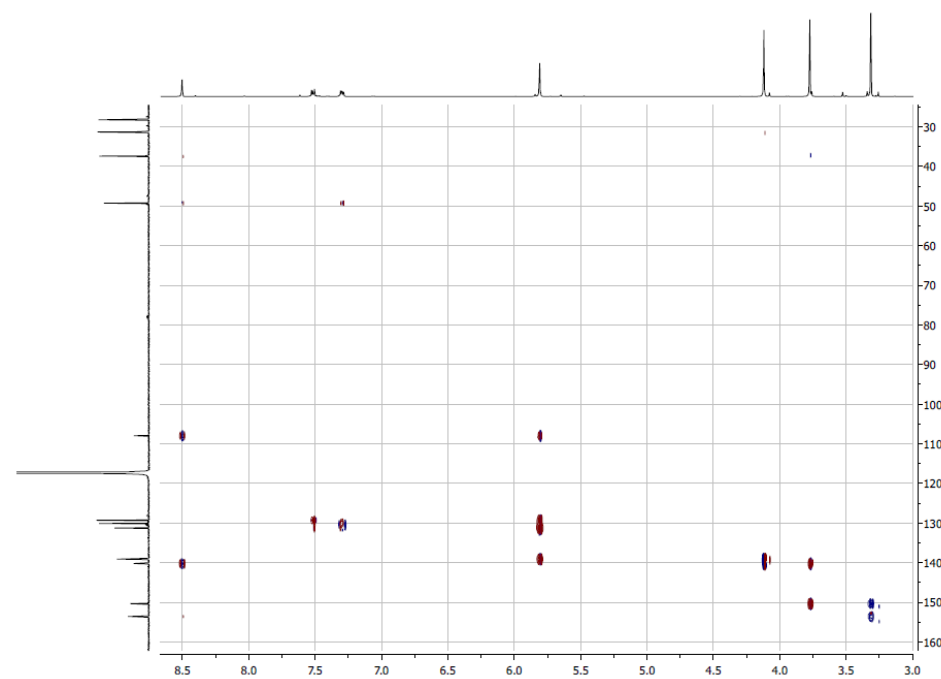

Figure S4.  $^{13}\text{C},^1\text{H}$ -HMBC spectrum of **1·2HBF<sub>4</sub>** in  $\text{CD}_3\text{CN}$ .

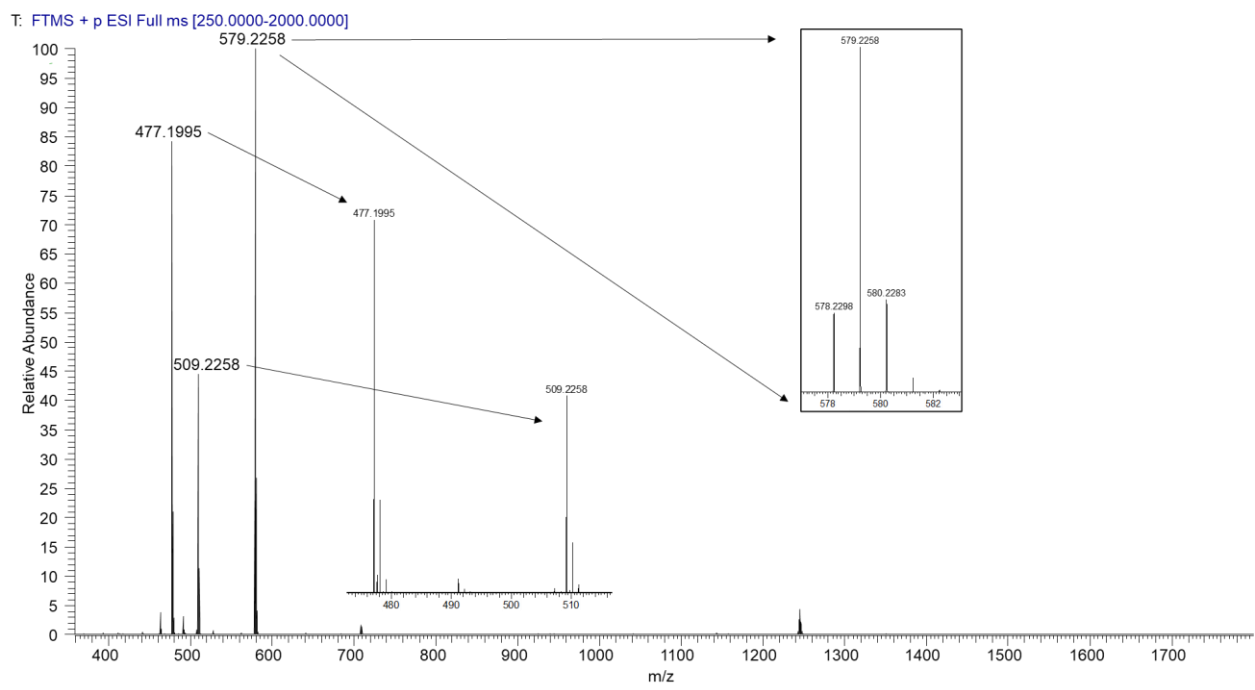

Figure S5. HRMS of **1**·2HBF<sub>4</sub> (in CH<sub>3</sub>CN).

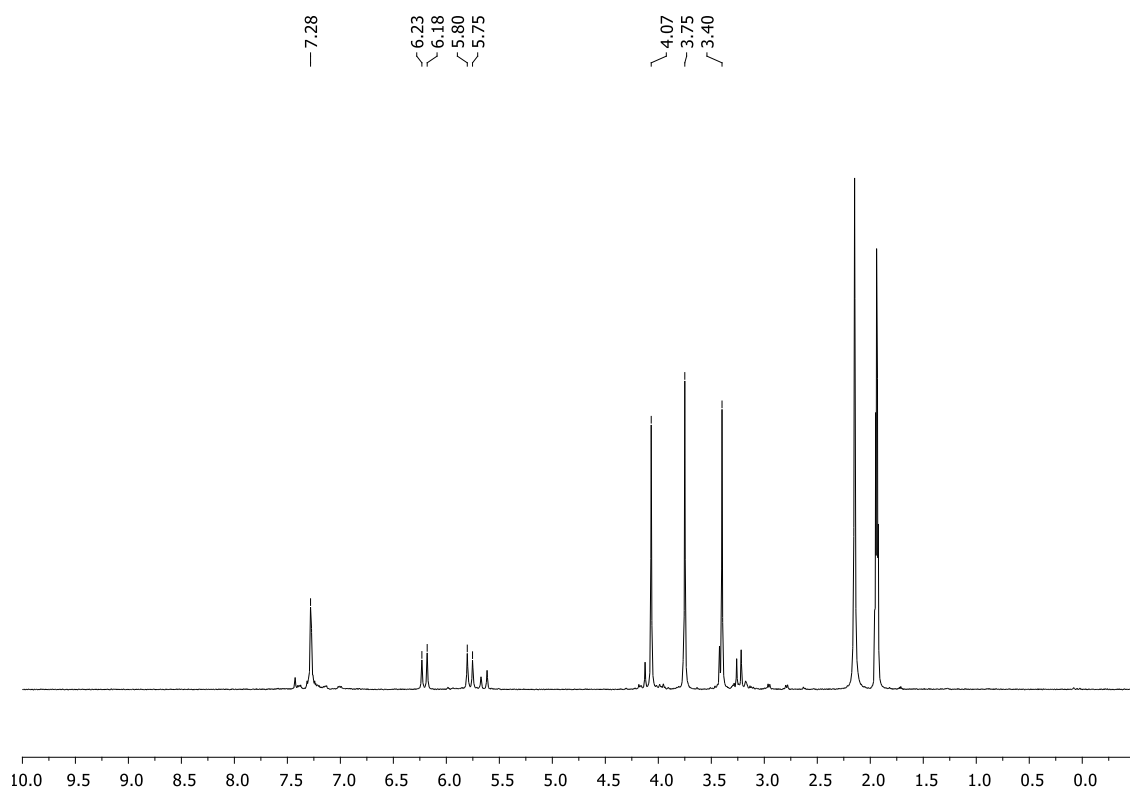

Figure S6.  $^1\text{H}$  NMR spectrum of complex **2** in  $\text{CD}_3\text{CN}$ .

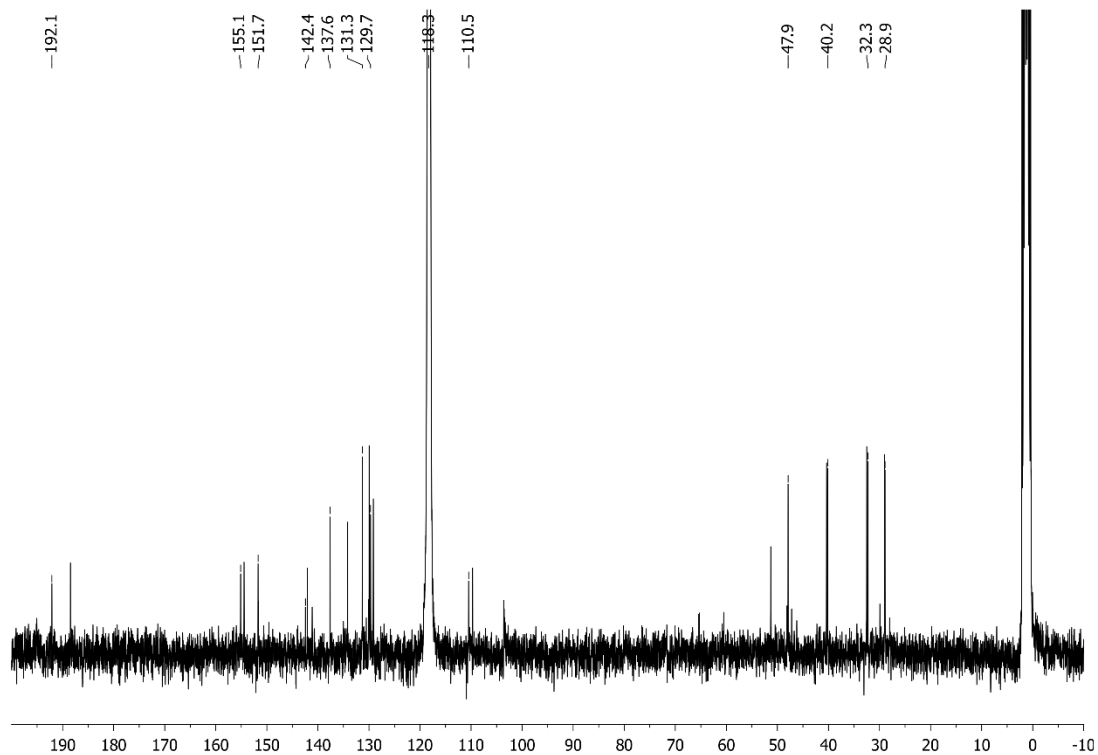

Figure S7.  $^{13}\text{C}\{^1\text{H}\}$  NMR spectrum of complex **2** in  $\text{CD}_3\text{CN}$ . The spectrum was registered overnight so that also signals of complex **3** are present.

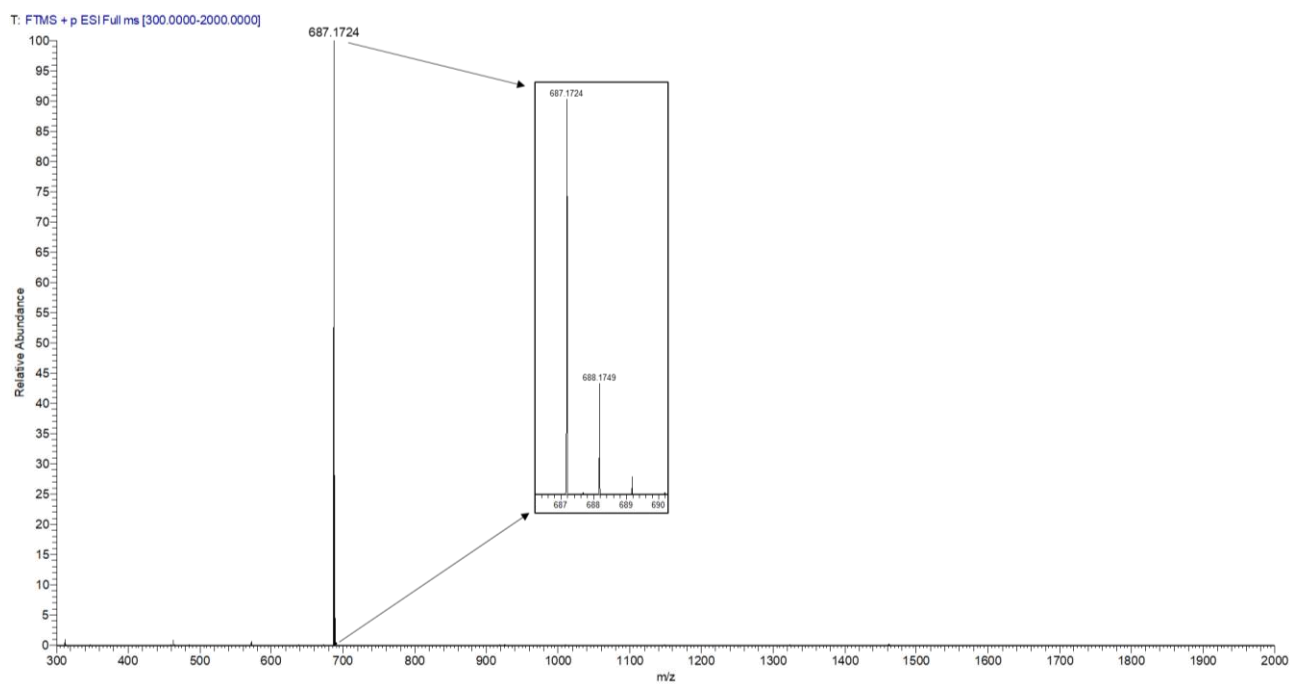

Figure S8. HRMS of complex **2** (in CH<sub>3</sub>CN).

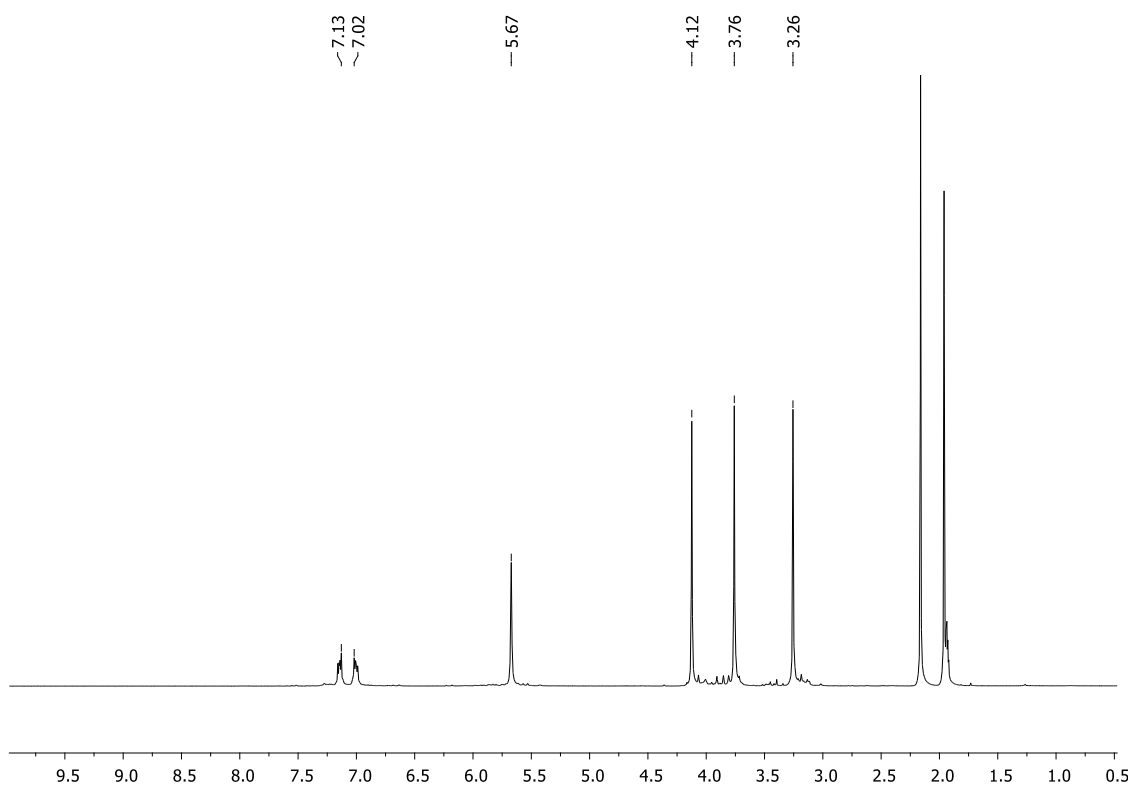

Figure S9.  $^1\text{H}$  NMR spectrum of complex **3** in  $\text{CD}_3\text{CN}$ .

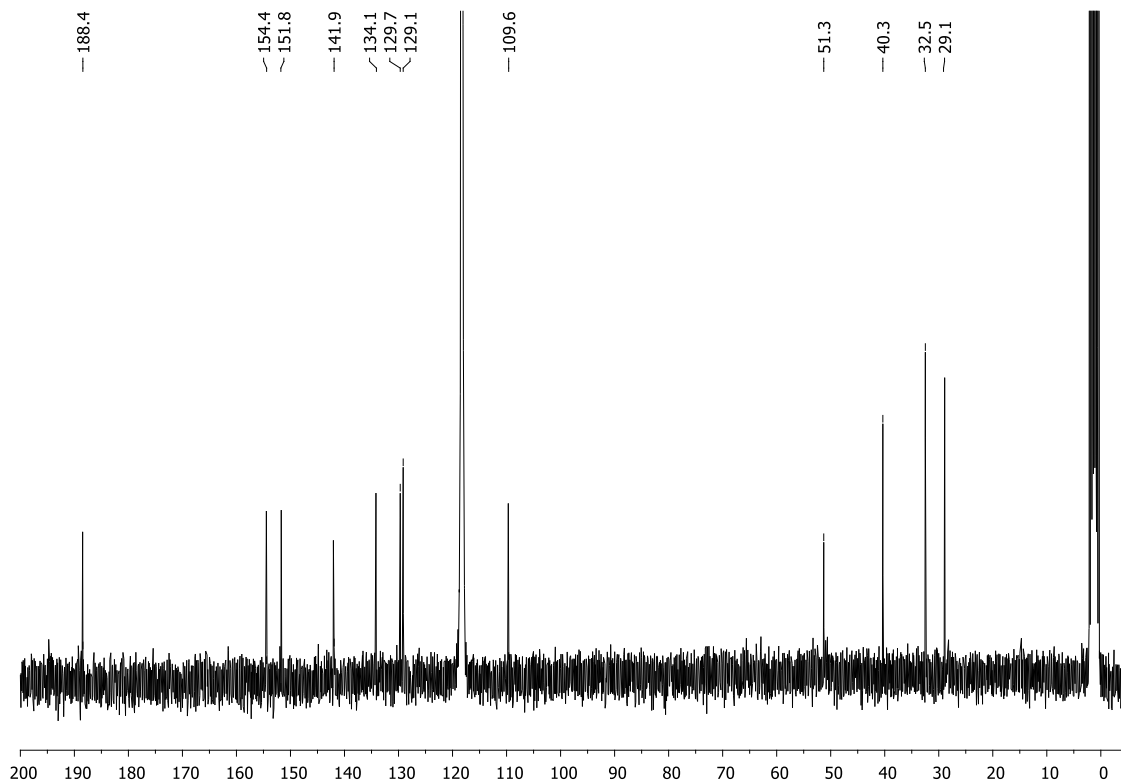

Figure S10.  $^{13}\text{C}\{^1\text{H}\}$  NMR spectrum of complex **3** in  $\text{CD}_3\text{CN}$ .

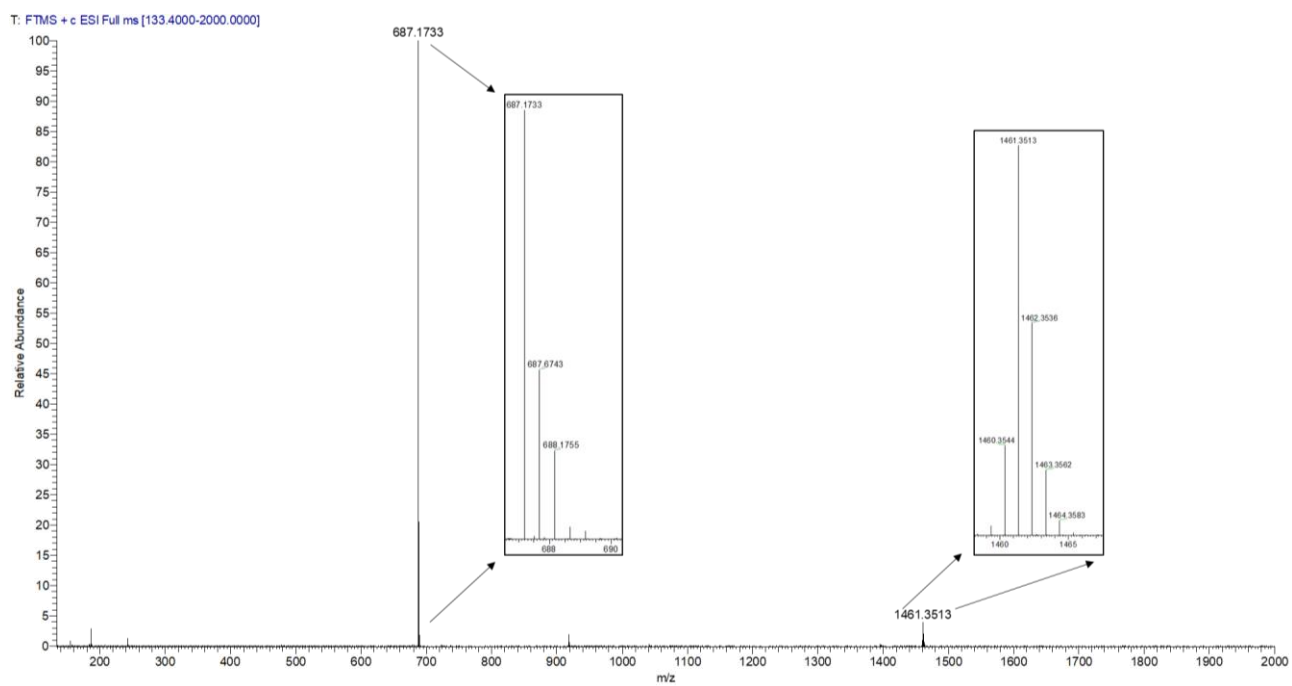

Figure S11. HRMS of complex **3** (in CH<sub>3</sub>CN).



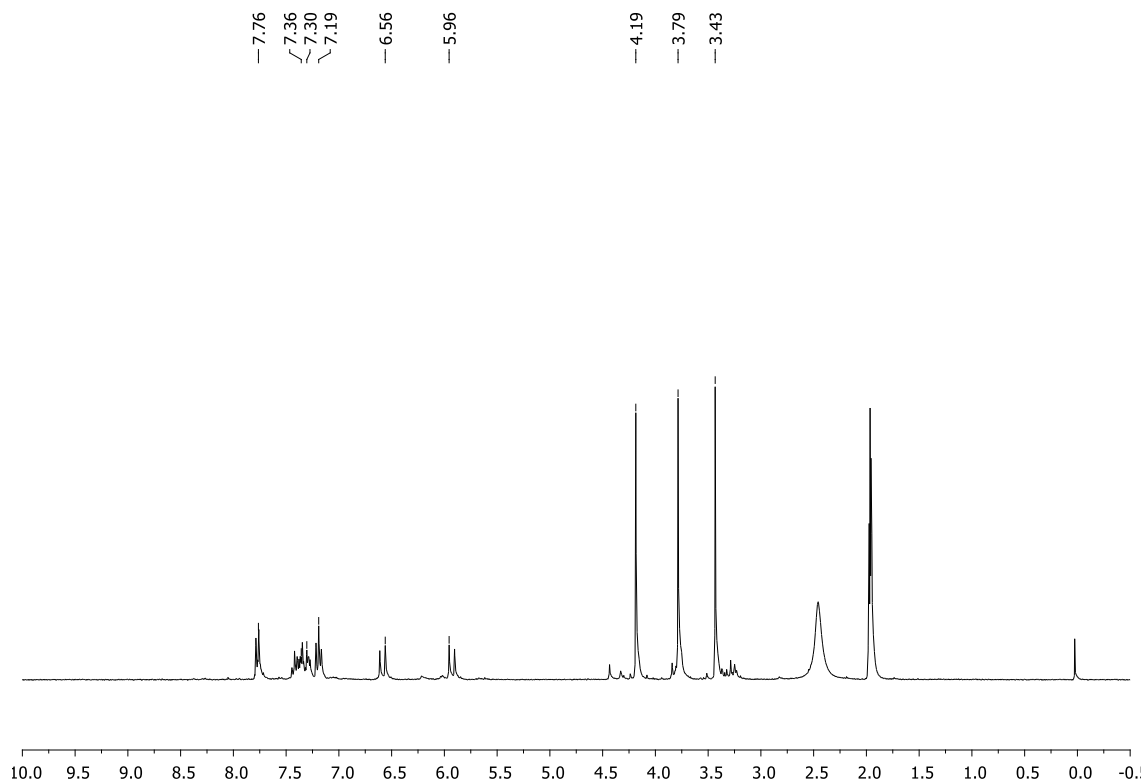

Figure S12.  $^1\text{H}$  NMR spectrum of complex **4** in  $\text{CD}_3\text{CN}$ .

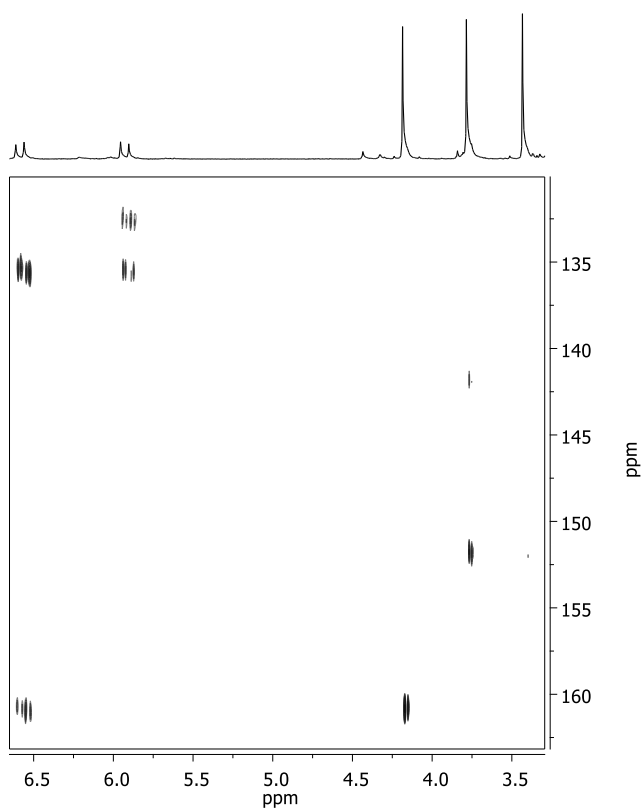

Figure S13.  $^{13}\text{C},^1\text{H}$ -HMBC spectrum of **4** in  $\text{CD}_3\text{CN}$  (detail on  $\text{CH}_3$  and  $\text{CH}_2$  signals).

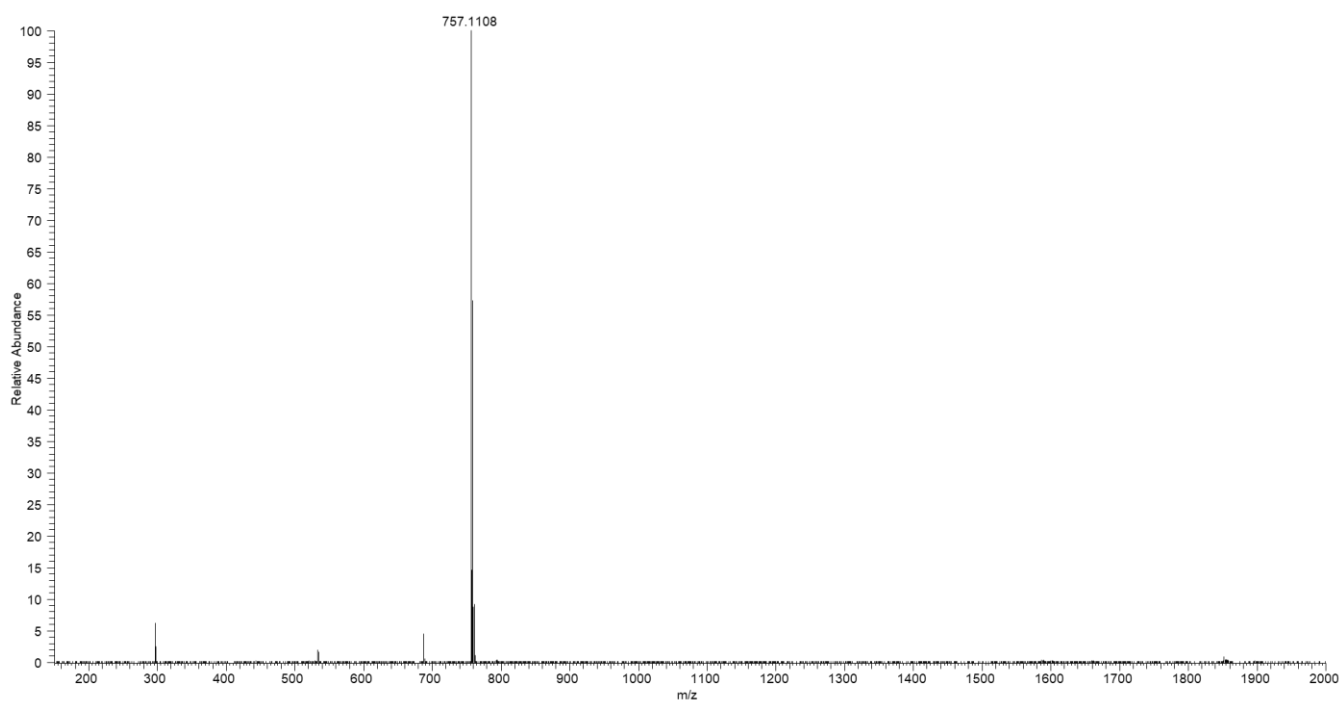

Figure S14. HRMS of complex **4** (in CH<sub>3</sub>CN).

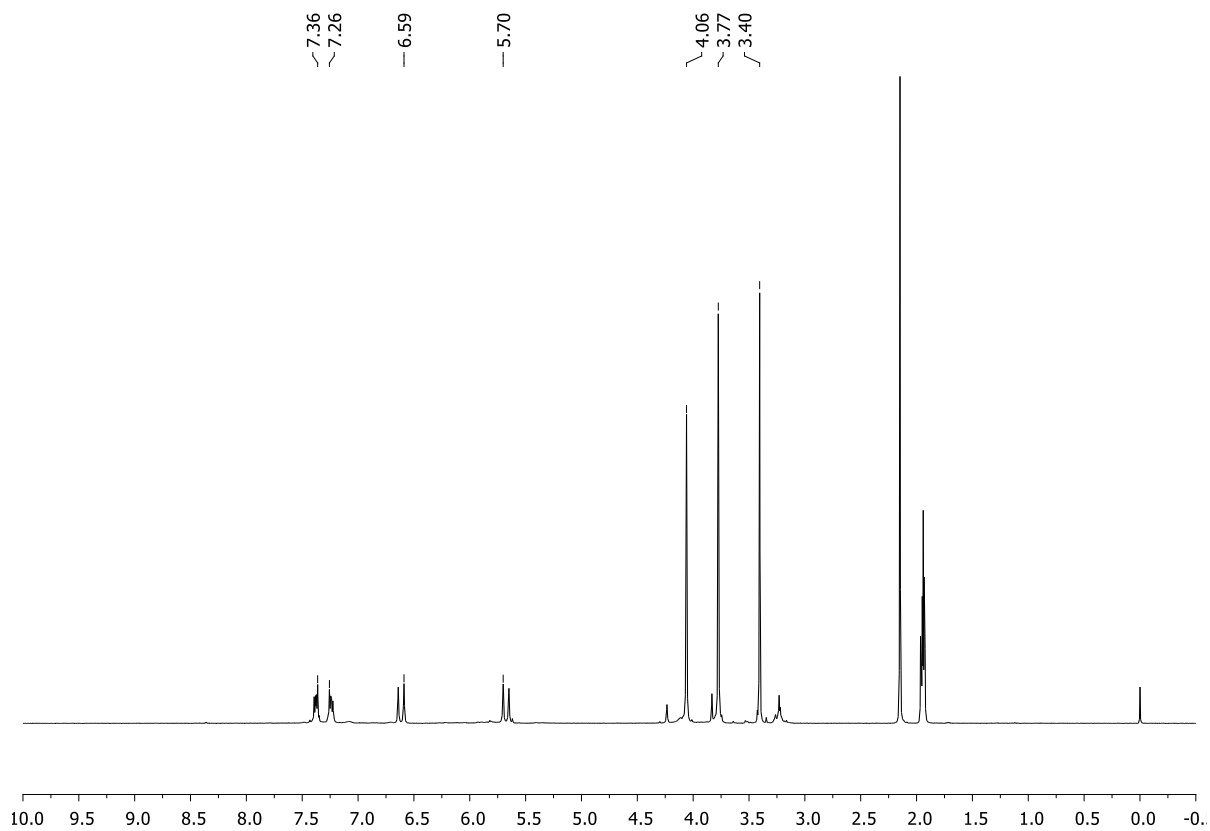

Figure S15.  $^1\text{H}$  NMR spectrum of complex **5** in  $\text{CD}_3\text{CN}$ .

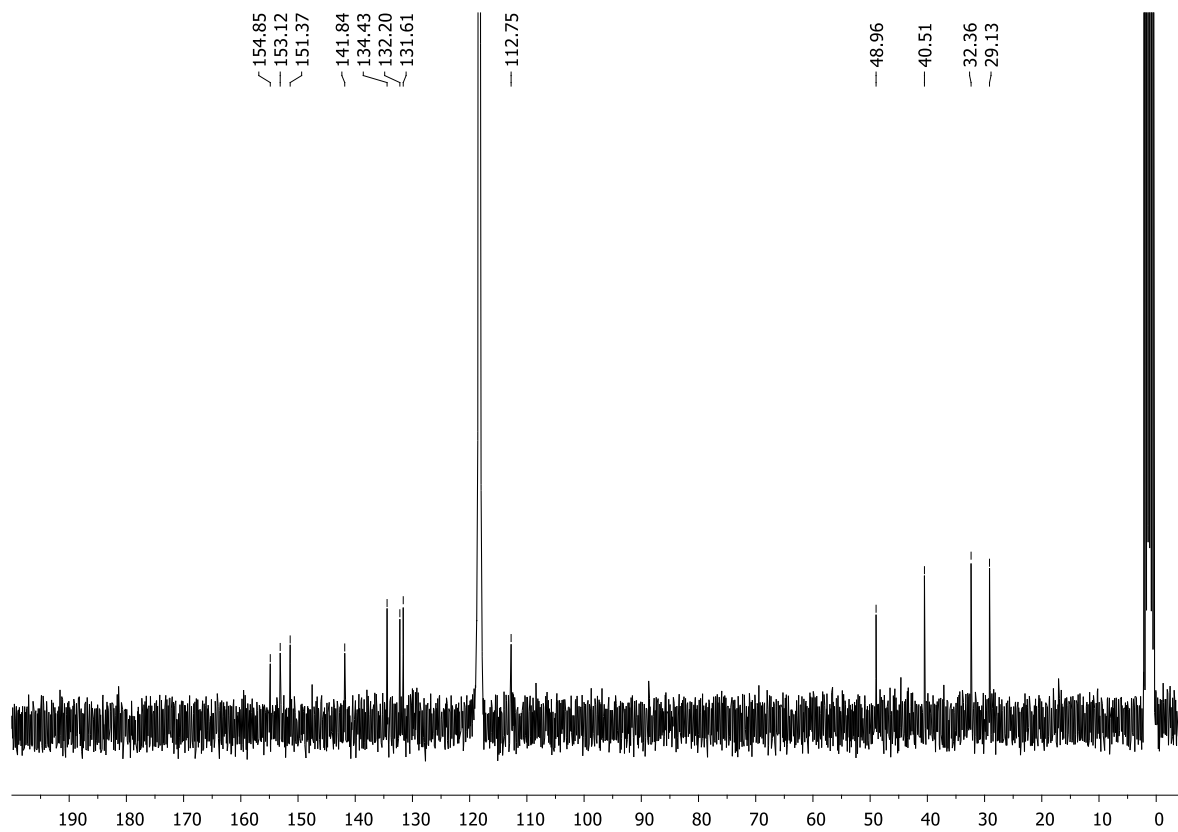

Figure S16.  $^{13}\text{C}\{^1\text{H}\}$  NMR spectrum of complex **5** in  $\text{CD}_3\text{CN}$ .

T: FTMS + c ESI Full ms [200.0000-2000.0000]

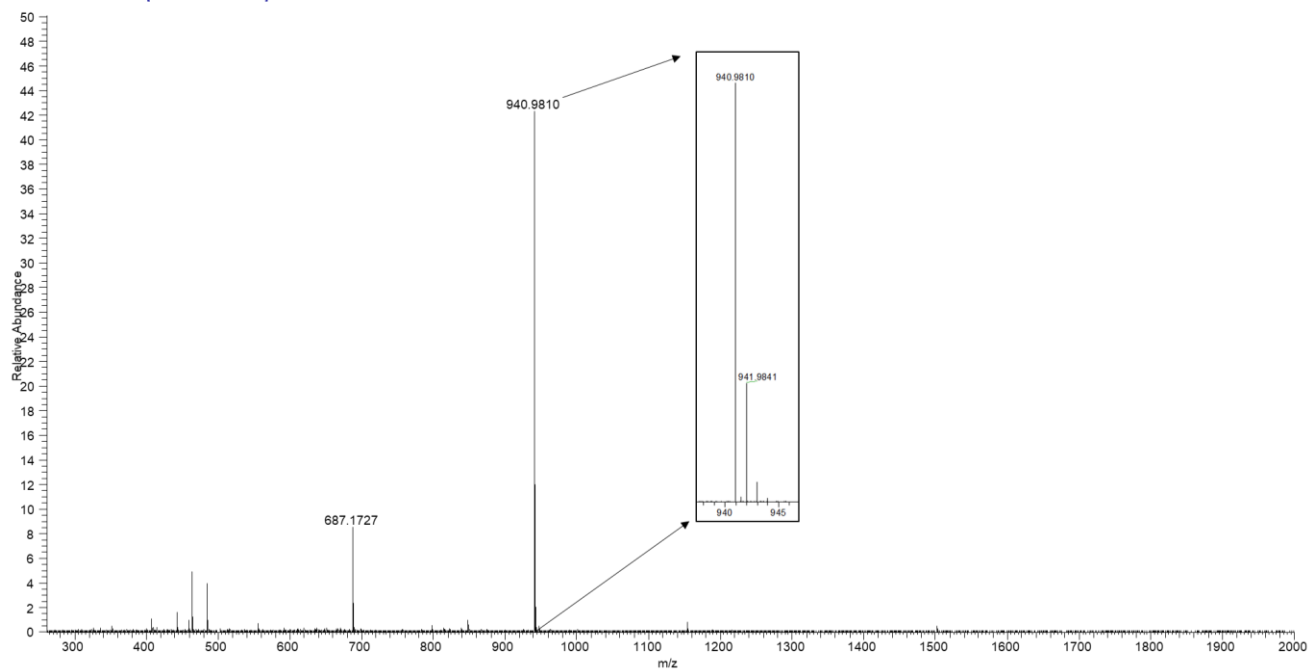

Figure S17. HRMS of complex 5 (in CH<sub>3</sub>CN).

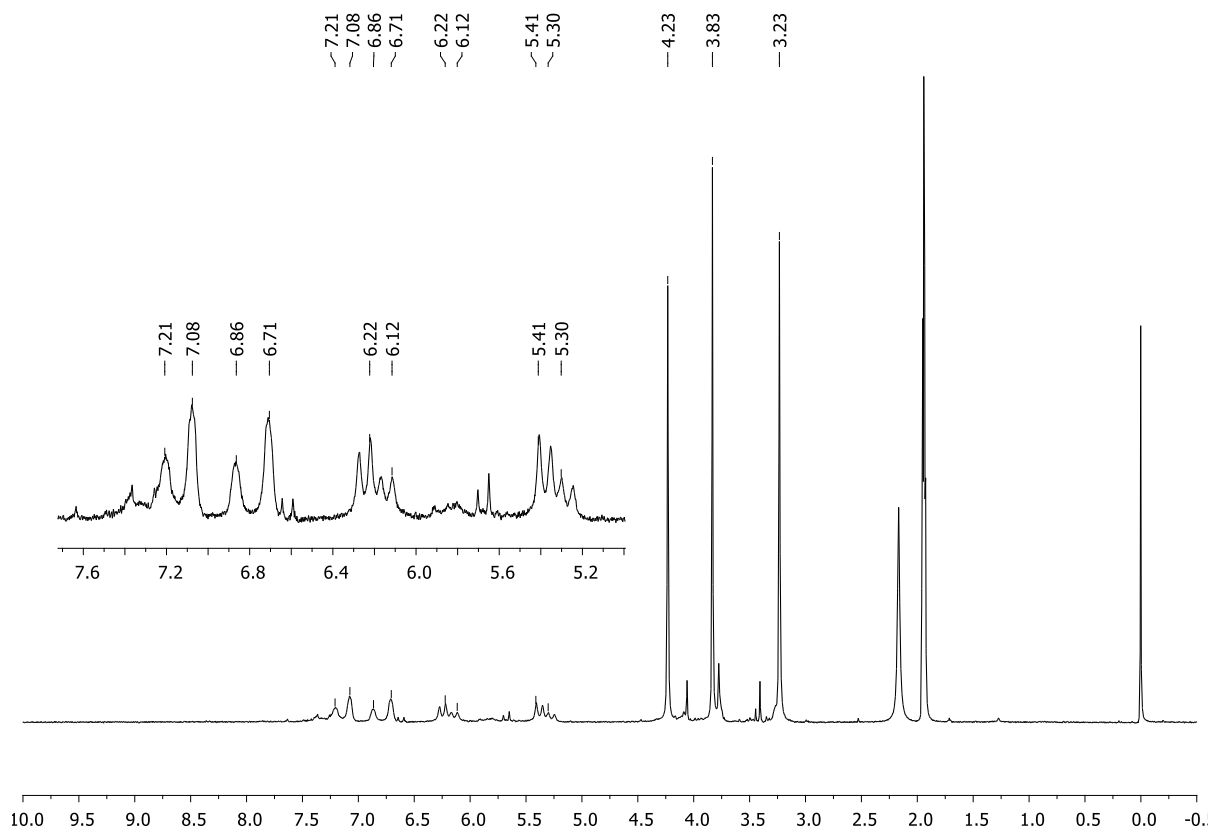

Figure S18.  $^1\text{H}$  NMR spectrum of complex **7** in  $\text{CD}_3\text{CN}$ .

Coordinates of fully optimized molecular structures; level of theory: (COSMO)-ZORA-BLYP-D3(BJ)/TZ2P

|               |           |           |           |   |           |           |           |
|---------------|-----------|-----------|-----------|---|-----------|-----------|-----------|
| 2 (gas-phase) |           |           |           | H | 4.084473  | 18.761985 | 15.283554 |
| Au            | 1.979851  | 21.503547 | 12.745023 | C | 4.138663  | 22.645243 | 14.833284 |
| H             | 1.526232  | 25.306405 | 10.652850 | H | 4.925055  | 23.170221 | 15.379614 |
| C             | 1.763846  | 19.487578 | 12.989882 | N | 2.500357  | 18.873928 | 13.946022 |
| C             | 2.124161  | 17.535017 | 14.061733 | N | 0.912561  | 18.527314 | 12.473843 |
| C             | 3.570960  | 25.081691 | 14.217179 | H | 0.157889  | 18.227372 | 10.514932 |
| C             | 1.126050  | 17.316105 | 13.131085 | N | 3.423767  | 23.704183 | 14.048503 |
| C             | 1.105723  | 24.775761 | 11.508856 | N | 2.637098  | 27.053055 | 13.183944 |
| C             | -0.042125 | 18.840794 | 11.395253 | C | 4.388565  | 25.818309 | 15.151501 |
| H             | 0.104375  | 19.891626 | 11.143334 | N | 0.524598  | 16.094737 | 12.969387 |
| H             | -1.068704 | 18.690614 | 11.735088 | C | 2.609659  | 16.510093 | 14.955142 |
| N             | 2.098305  | 24.671168 | 12.593646 | C | 0.938570  | 15.005898 | 13.802147 |
| C             | 2.524751  | 23.444597 | 13.069965 | N | 1.949937  | 15.270643 | 14.742201 |
| H             | 0.203966  | 25.280724 | 11.860778 | C | 3.416075  | 27.878119 | 14.057609 |
| C             | 2.738581  | 25.690666 | 13.297194 | N | 4.241211  | 27.221234 | 14.987507 |
| H             | 0.856292  | 23.756019 | 11.213790 | C | 1.776127  | 27.747128 | 12.203584 |
| C             | 1.501327  | 20.775114 | 17.723026 | H | 1.918259  | 28.814319 | 12.369927 |
| C             | 1.763406  | 22.149146 | 17.752843 | H | 2.078423  | 27.497317 | 11.183531 |
| H             | 1.317633  | 22.777387 | 18.519728 | H | 0.726145  | 27.492764 | 12.366727 |
| H             | 0.849415  | 20.323542 | 18.466411 | C | 5.022239  | 28.112786 | 15.878230 |
| C             | 2.102019  | 19.982228 | 16.749202 | H | 4.339163  | 28.744490 | 16.451112 |
| H             | 2.850340  | 23.767297 | 16.851422 | H | 5.609082  | 27.477452 | 16.539129 |
| H             | 1.923923  | 18.909601 | 16.746383 | H | 5.671484  | 28.751481 | 15.274847 |
| C             | 2.620952  | 22.705382 | 16.807917 | C | -0.535993 | 15.811434 | 11.980179 |
| C             | 2.952969  | 20.532647 | 15.774171 | H | -0.800013 | 14.761769 | 12.103767 |
| C             | 3.217599  | 21.921473 | 15.804154 | H | -1.415820 | 16.430183 | 12.172575 |
| C             | 3.550201  | 19.561735 | 14.766373 | H | -0.166206 | 15.973592 | 10.964673 |
| H             | 4.602592  | 21.979790 | 14.105908 | C | 2.341800  | 14.118118 | 15.588746 |
| H             | 4.231236  | 20.039156 | 14.062532 | H | 3.122103  | 14.462802 | 16.264870 |

|   |          |           |           |
|---|----------|-----------|-----------|
| H | 1.471706 | 13.763793 | 16.146607 |
| H | 2.707638 | 13.308001 | 14.953473 |
| O | 3.479171 | 16.661924 | 15.812886 |
| O | 0.429564 | 13.902505 | 13.695804 |
| O | 3.357880 | 29.094760 | 13.993088 |
| O | 5.124639 | 25.322165 | 16.003987 |

**3-anti closed** (gas-phase)

|    |             |             |             |   |             |            |             |
|----|-------------|-------------|-------------|---|-------------|------------|-------------|
|    |             |             |             | C | -2.09864755 | 1.69962915 | -4.02354275 |
| Au | 1.48682679  | 1.84287671  | 3.20385388  | H | 2.06946462  | 3.72982683 | -2.58721689 |
| Au | 1.77892133  | 4.95953383  | 3.42941953  | H | 3.25390068  | 1.40237511 | -2.39308905 |
| N  | 4.38678324  | 5.22501223  | 9.54435471  | H | -3.83720390 | 4.30380196 | -2.62398288 |
| H  | 6.35191146  | 4.99686297  | 10.21086075 | C | -1.57689225 | 5.14632902 | 2.50947751  |
| C  | 4.83384219  | 4.95364600  | 8.22637397  | H | -1.30094695 | 5.99672225 | 3.13812370  |
| O  | 5.98840159  | 4.61121805  | 7.97704670  | C | -1.78696830 | 3.91792299 | 3.38306162  |
| C  | 3.77476714  | 5.10420723  | 7.25280364  | N | -0.55656161 | 5.03821501 | 1.44272473  |
| C  | 2.49587376  | 5.48840831  | 7.59027628  | C | 0.78002070  | 4.92152181 | 1.62911936  |
| N  | 1.50187287  | 1.28151670  | 0.22501141  | N | 1.33000906  | 4.83265543 | 0.35829883  |
| C  | 0.69233683  | 1.65349251  | 1.30206596  | N | 0.38537619  | 4.87192722 | -1.97077412 |
| N  | -0.52545126 | 1.90725518  | 0.77025544  | H | 1.36021211  | 4.81487647 | -3.79809533 |
| C  | -1.56758075 | 1.84989081  | -1.59340252 | C | -0.83854008 | 4.94261954 | -2.72305612 |
| O  | -2.72206525 | 2.19266287  | -1.34419000 | O | -0.82112781 | 4.81349768 | -3.93527805 |
| N  | -1.12047962 | 1.57841168  | -2.91133951 | N | -2.01615757 | 5.16440478 | -1.99301313 |
| H  | -3.08555339 | 1.80662623  | -3.57799691 | H | -3.88266712 | 6.06268732 | -2.35249139 |
| C  | 0.18417473  | 1.23636385  | -3.30122291 | C | -2.13920511 | 5.19787121 | -0.58464077 |
| O  | 0.49594395  | 1.07769658  | -4.46608397 | O | -3.22824131 | 5.31836348 | -0.02596988 |
| N  | 1.15508309  | 1.07728505  | -2.25045894 | C | -0.86252391 | 5.06505297 | 0.07818490  |
| H  | 2.47947014  | 0.55662977  | -3.75198158 | C | 0.32639600  | 4.92773257 | -0.60334992 |
| C  | 0.77014350  | 1.31436968  | -0.95706562 | H | -2.50938059 | 5.39573006 | 1.99168990  |
| C  | -0.50865978 | 1.69897828  | -0.61972288 | H | -2.31032541 | 2.98344737 | 0.86127409  |
| C  | -1.82251410 | 2.21256143  | 1.45577278  | C | 5.08842863  | 4.59043337 | 5.17722365  |
| C  | -1.82242076 | 2.58215871  | 2.92119824  | H | 5.69962972  | 5.48775291 | 5.30689880  |
| H  | -2.43377457 | 1.31531132  | 1.32588213  | H | 5.57637998  | 3.81967455 | 5.77176307  |
| H  | 2.76211819  | -0.31593750 | -2.22739283 | N | 3.79142121  | 4.89570840 | 5.86285788  |
| C  | 2.50835800  | 0.65101004  | -2.66686451 | C | 2.57348922  | 5.14901354 | 5.33116873  |
| H  | -2.04323844 | 0.80263663  | -4.64201361 | N | 1.76397178  | 5.52085298 | 6.40829116  |
| H  | -1.85087016 | 2.57543781  | -4.62760404 | N | 2.11102722  | 5.72553996 | 8.88368700  |
| H  | 2.34512969  | 5.50161471  | -2.48038800 | H | 0.78682844  | 6.24649032 | 10.38526993 |
| C  | 1.63257652  | 4.71915625  | -2.74771285 | C | 3.08209479  | 5.56679506 | 9.93435260  |



|   |             |             |             |   |             |            |             |
|---|-------------|-------------|-------------|---|-------------|------------|-------------|
| O | 2.77042750  | 5.72551670  | 11.09923266 | H | 3.20690119  | 4.47767733 | 1.14179476  |
| N | 1.93554087  | 1.97001432  | 6.27498108  | H | 2.97784341  | 3.81741173 | -0.48792373 |
| C | 2.48564129  | 1.88106149  | 5.00421718  | C | 0.48966678  | 2.13440761 | 6.47076437  |
| N | 3.82223821  | 1.76469759  | 5.19071880  | H | 0.28722475  | 2.98524808 | 7.12031930  |
| C | 5.40476256  | 1.60567029  | 7.21822619  | H | 0.05845034  | 2.32335758 | 5.49122949  |
| O | 6.49385411  | 1.48517084  | 6.65966567  | H | 0.04532297  | 1.22949903 | 6.89006227  |
| N | 5.28161059  | 1.63940208  | 8.62658240  | C | 0.38300052  | 5.99958835 | 6.23263901  |
| H | 7.14797746  | 0.74099759  | 8.98656040  | H | 0.29738361  | 7.03979503 | 6.55282727  |
| C | 4.10390188  | 1.86111545  | 9.35651134  | H | 0.16146153  | 5.92950510 | 5.16844016  |
| O | 4.08639303  | 1.99041212  | 10.56871158 | H | -0.31937209 | 5.37440146 | 6.78394820  |
| N | 2.88003237  | 1.93153869  | 8.60411817  | C | 5.36506330  | 5.10406033 | 10.65648367 |
| H | 1.90523112  | 1.99014383  | 10.43138829 | H | 5.30980650  | 6.00124105 | 11.27470071 |
| C | 2.93911115  | 1.87540741  | 7.23670706  | H | 5.11726361  | 4.22846175 | 11.26083706 |
| C | 4.12811876  | 1.73822506  | 6.55528864  | C | 0.75776572  | 6.15175765 | 9.30018816  |
| C | 4.84264550  | 1.65650206  | 4.12405012  | H | 0.50379951  | 7.11852286 | 8.86043513  |
| H | 5.77514012  | 1.40732117  | 4.64194758  | H | 0.01226954  | 5.40020300 | 9.02680565  |
| H | 4.56683757  | 0.80595041  | 3.49556039  | C | 6.55451416  | 1.56327691 | 9.38799918  |
| H | -2.20311211 | 0.53573125  | 3.46408992  | H | 7.10276978  | 2.50001719 | 9.25719456  |
| H | -2.82580224 | 1.02677463  | 5.80578867  | H | 6.31293291  | 1.40014240 | 10.43556202 |
| H | -2.85981449 | 3.40063562  | 6.59477207  | C | 1.63277127  | 2.08454758 | 9.38091199  |
| H | -2.18082650 | 5.20917023  | 5.05539313  | H | 1.19540347  | 3.07346901 | 9.21927846  |
| C | -2.14568412 | 4.17721765  | 4.71536832  | H | 0.92057715  | 1.30143181 | 9.11452859  |
| C | -2.53365225 | 3.15899116  | 5.58601785  | C | -3.28909760 | 5.24069369 | -2.75434949 |
| C | -2.52207367 | 1.83418834  | 5.14489102  | H | -3.04758189 | 5.40435627 | -3.80184631 |
| C | -2.16130656 | 1.56018795  | 3.82672225  | C | 5.05262043  | 2.88474881 | 3.25022252  |
| C | 2.88266246  | 0.80228918  | 0.40076796  | C | 5.08816514  | 4.22059132 | 3.71185819  |
| H | 3.10397281  | 0.87179768  | 1.46505496  | C | 5.41117271  | 2.62521294 | 1.91792079  |
| H | 2.96802631  | -0.23779254 | 0.08011634  | C | 5.79908723  | 3.64327761 | 1.04705540  |
| H | 3.58534748  | 1.42752599  | -0.15008878 | C | 5.78759669  | 4.96815320 | 1.48795980  |
| C | 2.77581162  | 4.66774712  | 0.16242163  | C | 5.42697910  | 5.24239463 | 2.80612106  |
| H | 3.22062655  | 5.57282308  | -0.25601839 | H | 5.46886588  | 6.26691232 | 3.16857047  |

|   |            |            |            |
|---|------------|------------|------------|
| H | 6.09130423 | 5.77544319 | 0.82690045 |
| H | 6.12513542 | 3.40144964 | 0.03830833 |
| H | 5.44623802 | 1.59320027 | 1.57807602 |

**3-anti open** (gas-phase)

|    |             |            |             |   |             |            |             |
|----|-------------|------------|-------------|---|-------------|------------|-------------|
|    |             |            |             | C | -5.07796600 | 3.68589600 | 1.91315800  |
| Au | 1.61002700  | 2.07039500 | 3.33325300  | H | -5.98278400 | 4.28599500 | 1.86754800  |
| Au | 1.62172500  | 5.32771100 | 3.29644500  | C | -3.83668800 | 4.30186600 | 2.05953100  |
| N  | 4.87972900  | 4.80004100 | 9.04209100  | H | -3.78016500 | 5.38660700 | 2.12818200  |
| H  | 6.65767700  | 3.80189800 | 9.48593000  | C | -1.37581300 | 4.30952700 | 2.34482400  |
| C  | 5.07067800  | 4.43362000 | 7.67737500  | H | -1.61339400 | 5.23840900 | 2.86913200  |
| O  | 6.01434000  | 3.73607700 | 7.33331700  | H | -0.68274100 | 3.74064000 | 2.96960700  |
| C  | 4.00984100  | 4.94273200 | 6.81951700  | N | -0.51246800 | 4.75099800 | 1.16909300  |
| C  | 2.91840400  | 5.61877700 | 7.34941300  | C | 0.69084400  | 5.29950200 | 1.46099700  |
| N  | 1.41056400  | 2.16798700 | 0.23008100  | N | 1.21332100  | 5.78130700 | 0.27653100  |
| C  | 0.78920100  | 1.93155200 | 1.44949600  | N | 0.45087300  | 5.80962200 | -2.09515600 |
| N  | -0.45038800 | 1.47921700 | 1.15669700  | H | 1.29106500  | 6.74059300 | -3.74012600 |
| C  | -1.71664400 | 0.80865900 | -0.97767200 | C | -0.58761900 | 5.39687400 | -2.99406500 |
| O  | -2.67816000 | 0.22189500 | -0.49930900 | O | -0.52423700 | 5.64554300 | -4.18355800 |
| N  | -1.52114500 | 0.96113500 | -2.37905800 | N | -1.65233200 | 4.68597600 | -2.42843200 |
| H  | -3.35560600 | 0.01375700 | -2.66080000 | H | -3.43894300 | 3.69106700 | -2.84377500 |
| C  | -0.41378900 | 1.54062900 | -3.00982300 | C | -1.84130400 | 4.35139600 | -1.05530100 |
| O  | -0.35565400 | 1.69141400 | -4.21816900 | O | -2.78736400 | 3.66647800 | -0.69295600 |
| N  | 0.68294800  | 1.94132600 | -2.16844600 | C | -0.77552600 | 4.87444700 | -0.21197000 |
| H  | 1.68176500  | 2.41504500 | -3.91676800 | C | 0.31818900  | 5.53215900 | -0.75991500 |
| C  | 0.53513200  | 1.84516800 | -0.80939500 | C | 7.07399600  | 4.29577600 | 4.56978900  |
| C  | -0.62702900 | 1.39043500 | -0.22457600 | H | 7.02612600  | 5.37914800 | 4.47692900  |
| C  | -1.51695000 | 1.22786000 | 2.16292400  | C | 4.61384600  | 4.31617900 | 4.27796100  |
| H  | -1.01568200 | 1.32820900 | 3.13230500  | H | 4.86027400  | 5.23163700 | 3.73446200  |
| H  | -1.83957000 | 0.19157600 | 2.04719400  | H | 3.91852600  | 3.73916500 | 3.66322900  |
| C  | -2.65180100 | 3.55355300 | 2.11069100  | N | 3.74984800  | 4.78957000 | 5.44083900  |
| C  | -2.72156100 | 2.14496100 | 2.04168300  | C | 2.55053200  | 5.33815400 | 5.13319900  |
| C  | -3.97515300 | 1.53773600 | 1.89268000  | N | 2.02774700  | 5.84997400 | 6.30491600  |
| H  | -4.03131100 | 0.45694800 | 1.80889000  | N | 2.78360100  | 5.92686200 | 8.67763500  |
| C  | -5.14566600 | 2.29449100 | 1.82757600  | H | 1.93959700  | 6.89198600 | 10.30064300 |
| H  | -6.10434600 | 1.79676600 | 1.70893900  | C | 3.81743200  | 5.52913500 | 9.58859800  |

|   |            |            |             |   |             |             |             |
|---|------------|------------|-------------|---|-------------|-------------|-------------|
| O | 3.75219100 | 5.80507800 | 10.77197700 | H | 2.92341500  | 6.45469200  | 1.23504700  |
| N | 1.80438700 | 2.24342900 | 6.43246400  | H | 3.20368900  | 5.94724100  | -0.44818300 |
| C | 2.42765700 | 1.97374600 | 5.22094200  | C | 0.40489500  | 2.68968900  | 6.50770400  |
| N | 3.66376800 | 1.52158600 | 5.52817400  | H | 0.31981900  | 3.57914900  | 7.13107300  |
| C | 4.92000200 | 0.89552100 | 7.68214800  | H | 0.09313800  | 2.93219900  | 5.49107600  |
| O | 5.87900000 | 0.29084200 | 7.22151800  | H | -0.23417200 | 1.89654600  | 6.90374800  |
| N | 4.72161900 | 1.08395600 | 9.07888000  | C | 0.72795900  | 6.54812000  | 6.33923300  |
| H | 6.55654300 | 0.14619700 | 9.38822400  | H | 0.85697500  | 7.58933000  | 6.63775300  |
| C | 3.61516300 | 1.68345600 | 9.69213600  | H | 0.32564700  | 6.51379000  | 5.32586800  |
| O | 3.55362600 | 1.86239900 | 10.89645400 | H | 0.03655500  | 6.04802100  | 7.01960300  |
| N | 2.52341700 | 2.07005500 | 8.83782700  | C | 5.91425900  | 4.38556200  | 10.02434000 |
| H | 1.52029900 | 2.58656800 | 10.57142500 | H | 6.36780400  | 5.27513100  | 10.46747200 |
| C | 2.67498600 | 1.94094200 | 7.48197000  | H | 5.44130600  | 3.79810700  | 10.81390800 |
| C | 3.83627400 | 1.46563300 | 6.91172200  | C | 1.70939800  | 6.77514000  | 9.24206100  |
| C | 4.73071000 | 1.23820900 | 4.53098700  | H | 1.70361300  | 7.75691400  | 8.76320900  |
| H | 4.23246200 | 1.31932200 | 3.55825300  | H | 0.73453500  | 6.29270200  | 9.14134600  |
| H | 5.04499900 | 0.20250400 | 4.67199700  | C | 5.76853400  | 0.57969900  | 10.00108400 |
| C | 5.88333600 | 3.55576300 | 4.53264100  | H | 6.15403900  | 1.40448600  | 10.60268900 |
| C | 5.94209300 | 2.14859100 | 4.63332900  | H | 5.33764000  | -0.17257100 | 10.66595200 |
| C | 7.19068000 | 1.53515200 | 4.79807000  | C | 1.33573900  | 2.64406500  | 9.49893700  |
| H | 7.23821800 | 0.45605200 | 4.90597300  | H | 1.21084700  | 3.69389900  | 9.21865900  |
| C | 8.36695100 | 2.28398600 | 4.84867300  | H | 0.44001000  | 2.07015900  | 9.25175400  |
| H | 9.32149200 | 1.78158900 | 4.98022600  | C | -2.69199400 | 4.25499100  | -3.39814900 |
| C | 8.31014600 | 3.67367500 | 4.73251900  | H | -3.13918800 | 5.13669600  | -3.86283500 |
| H | 9.21947500 | 4.26767100 | 4.76692100  | H | -2.22555700 | 3.64375200  | -4.17344800 |
| C | 2.81239100 | 2.60406400 | 0.14018900  | C | 1.52542000  | 6.64340800  | -2.68048500 |
| H | 3.12934300 | 2.86660300 | 1.15022300  | H | 1.53619500  | 7.63411900  | -2.22049200 |
| H | 3.44526400 | 1.79866500 | -0.24080800 | H | 2.49922800  | 6.15993900  | -2.57470000 |
| H | 2.90044300 | 3.47929800 | -0.50266600 | C | -2.57361000 | 0.44069600  | -3.28583700 |
| C | 2.51829000 | 6.46852300 | 0.22232600  | H | -2.96695600 | 1.25558400  | -3.89601900 |
| H | 2.39645600 | 7.50343400 | -0.10007600 | H | -2.14507300 | -0.31928600 | -3.94326200 |

|   |            |            |             |
|---|------------|------------|-------------|
| C | 1.86998400 | 2.49673600 | -2.84648500 |
| H | 1.99850200 | 3.55240300 | -2.59083200 |
| H | 2.76497400 | 1.92619900 | -2.58908400 |

|                          |             |             |             |   |             |             |             |
|--------------------------|-------------|-------------|-------------|---|-------------|-------------|-------------|
| <b>3-syn (gas-phase)</b> |             |             |             | H | 4.91526600  | -1.37060800 | 20.54359000 |
| Au                       | 9.86058800  | 0.45872200  | 19.23866800 | C | 3.49130400  | -0.53595900 | 21.92203600 |
| Au                       | 9.33013400  | 3.14390300  | 21.07516500 | H | 2.84268900  | -1.40750900 | 21.89878000 |
| O                        | 12.94710000 | -3.67116600 | 22.39738200 | C | 3.17039800  | 0.56484300  | 22.71768500 |
| C                        | 12.98826800 | -1.56217300 | 21.30076200 | H | 2.26523700  | 0.56350200  | 23.31904800 |
| C                        | 13.75363400 | -0.57523300 | 20.71694000 | C | 4.01598800  | 1.67461800  | 22.74133900 |
| C                        | 13.20292100 | 1.37420000  | 19.11774400 | H | 3.75313200  | 2.53414500  | 23.34961300 |
| H                        | 12.25411700 | 1.81643500  | 18.81018500 | C | 6.07269900  | 2.94016100  | 22.11916800 |
| H                        | 13.75489400 | 1.04541500  | 18.23370300 | H | 5.60181500  | 3.64637200  | 22.80541200 |
| C                        | 9.01614400  | 1.50472800  | 16.09771900 | H | 7.06676400  | 2.69143000  | 22.50742800 |
| H                        | 8.85294700  | 0.82770800  | 15.25835000 | N | 6.33539600  | 3.66778600  | 20.84543200 |
| H                        | 9.91156100  | 1.19383500  | 16.63762700 | C | 7.54903400  | 3.77621200  | 20.25890000 |
| N                        | 7.89667000  | 1.42947000  | 17.05524400 | N | 7.33524300  | 4.41728800  | 19.04612700 |
| C                        | 8.08199300  | 1.01596100  | 18.36020800 | N | 5.28890400  | 5.29692300  | 17.87538400 |
| N                        | 6.86528200  | 1.03274000  | 18.95593800 | H | 6.31454800  | 4.92049900  | 16.05438300 |
| C                        | 4.45776900  | 1.72225500  | 18.17633200 | C | 3.86097300  | 5.43964200  | 17.98502500 |
| O                        | 3.78923100  | 1.60564900  | 19.19308900 | O | 3.21707500  | 5.89221400  | 17.05415000 |
| N                        | 3.87771900  | 2.19524200  | 16.96132100 | N | 3.28100300  | 5.04135000  | 19.19793100 |
| H                        | 2.04955900  | 2.31222200  | 17.96169700 | H | 1.65200900  | 6.08728500  | 20.05854500 |
| C                        | 4.52225100  | 2.42017500  | 15.74046400 | C | 3.95311000  | 4.48985800  | 20.32111300 |
| O                        | 3.93441800  | 2.81959800  | 14.75213300 | H | 8.23561000  | 4.39626300  | 17.13265100 |
| N                        | 5.93424300  | 2.16872000  | 15.70909100 | C | 5.35231500  | 4.25129100  | 20.04559300 |
| H                        | 6.96497300  | 1.31819700  | 14.05394300 | C | 5.97607200  | 4.70704800  | 18.90423200 |
| C                        | 6.54841100  | 1.70094100  | 16.84188400 | C | 8.44223100  | 4.75697100  | 18.14003800 |
| C                        | 5.88327700  | 1.45751200  | 18.03658300 | H | 8.60997400  | 5.83659500  | 18.11878500 |
| C                        | 6.78155200  | 0.49614600  | 20.37879400 | H | 9.33201200  | 4.25828800  | 18.52728300 |
| H                        | 7.60072400  | 1.00650400  | 20.89042800 | H | 15.90985200 | 0.60763700  | 19.26680700 |
| H                        | 7.04754300  | -0.55961600 | 20.28774400 | C | 15.75500800 | -1.47294600 | 21.72678800 |
| C                        | 5.18990800  | 1.71268300  | 21.97788400 | O | 16.94659800 | -1.39369200 | 21.96998400 |
| C                        | 5.50749300  | 0.60340700  | 21.16402200 | N | 14.95809900 | -2.51505200 | 22.21691900 |
| C                        | 4.65742200  | -0.51140800 | 21.15977100 | H | 16.20540900 | -3.10862600 | 23.81694600 |

|   |             |             |             |   |             |             |             |
|---|-------------|-------------|-------------|---|-------------|-------------|-------------|
| C | 13.55827400 | -2.68020500 | 22.02079400 | H | 10.62562900 | -3.12372900 | 21.16080200 |
| C | 12.46421200 | 4.47158100  | 21.35732400 | H | 9.63261000  | -1.67813100 | 20.89362300 |
| H | 13.23061100 | 4.39252900  | 20.58387500 | N | 11.66202300 | -1.31909300 | 20.93865900 |
| H | 12.73608300 | 5.24666400  | 22.07474200 | C | 11.58250300 | -0.24238800 | 20.12452400 |
| N | 12.26855500 | 3.17640100  | 22.03555800 | N | 12.87970000 | 0.23259200  | 19.98602400 |
| C | 11.05168500 | 2.52286900  | 22.01970700 | N | 15.10854600 | -0.48871200 | 20.90066000 |
| N | 11.20288200 | 1.38973900  | 22.74698200 | H | 11.51024200 | 4.73111100  | 20.89640400 |
| C | 13.22241400 | 0.27352500  | 23.99283900 | H | 13.78776300 | 2.11528900  | 19.66240600 |
| O | 12.75772500 | -0.78432900 | 24.39131200 | H | 9.14835500  | 2.52562100  | 15.73427000 |
| N | 14.59385600 | 0.60577100  | 24.20865300 | O | 3.38049800  | 4.28084000  | 21.38213900 |
| H | 16.31741600 | -0.59296000 | 24.43768800 | C | 1.82250300  | 5.25934200  | 19.36485500 |
| C | 15.26960500 | 1.75486200  | 23.78539100 | H | 1.40101700  | 5.49292300  | 18.39014500 |
| O | 16.44585000 | 1.95161200  | 24.03046900 | H | 1.38297100  | 4.35234400  | 19.78326600 |
| N | 14.50553300 | 2.69975700  | 23.02393400 | C | 5.90502400  | 5.76369700  | 16.61745500 |
| H | 15.22404600 | 4.13538700  | 21.61978400 | H | 5.10769100  | 6.22036200  | 16.03210500 |
| C | 13.18105300 | 2.43887900  | 22.78375800 | H | 6.67992800  | 6.50591000  | 16.82065300 |
| C | 12.52243400 | 1.30341100  | 23.23743500 | C | 2.41518500  | 2.46057000  | 16.94834900 |
| C | 9.95835300  | 0.54331100  | 22.98024000 | H | 2.23968100  | 3.48173300  | 16.60627900 |
| H | 9.52657400  | 0.44766800  | 21.98130700 | H | 1.92846200  | 1.76643200  | 16.25890900 |
| H | 9.29994000  | 1.18415000  | 23.57126400 | C | 6.58612100  | 2.28802600  | 14.38511600 |
| C | 10.28047400 | -1.99928800 | 22.95195100 | H | 5.81311400  | 2.62603400  | 13.69568700 |
| C | 10.05700800 | -0.79407300 | 23.65282800 | H | 7.39076500  | 3.02606700  | 14.40900500 |
| C | 9.80433700  | -0.83765500 | 25.03101500 | C | 15.67874100 | -3.56550400 | 22.97750500 |
| H | 9.61609000  | 0.09225100  | 25.56395300 | H | 14.93538100 | -4.27997600 | 23.32568200 |
| C | 9.79556900  | -2.04424200 | 25.72802700 | H | 16.40753700 | -4.05514800 | 22.32696200 |
| H | 9.60429100  | -2.05474500 | 26.79766600 | C | 15.96433300 | 0.58431800  | 20.35736800 |
| C | 10.02887300 | -3.23492100 | 25.03830000 | H | 15.68067400 | 1.55191000  | 20.78024400 |
| H | 10.02576600 | -4.18527800 | 25.56528200 | H | 16.98343900 | 0.35245100  | 20.66567700 |
| C | 10.26651600 | -3.20580600 | 23.66372100 | C | 15.18510600 | 3.97468300  | 22.69931100 |
| H | 10.46151600 | -4.13308100 | 23.13478500 | H | 14.68708000 | 4.81197200  | 23.19390900 |
| C | 10.48675000 | -2.08048700 | 21.44980700 | H | 16.20110600 | 3.88349000  | 23.08216100 |

|   |             |             |             |
|---|-------------|-------------|-------------|
| C | 15.41828000 | -0.34197700 | 25.00268200 |
| H | 15.71126100 | 0.13198900  | 25.94284100 |
| H | 14.80752200 | -1.22151200 | 25.19369400 |



**3-anti open** (acetonitrile)

|    |           |          |           |   |           |          |           |
|----|-----------|----------|-----------|---|-----------|----------|-----------|
|    |           |          |           | C | -5.101514 | 3.548901 | 2.070617  |
| Au | 1.604900  | 2.024498 | 3.336078  | H | -6.021734 | 4.127529 | 2.088632  |
| Au | 1.615120  | 5.243956 | 3.301773  | C | -3.869843 | 4.191332 | 2.181541  |
| N  | 4.938472  | 4.790607 | 8.995506  | H | -3.832748 | 5.273247 | 2.286645  |
| H  | 6.686933  | 3.749039 | 9.440180  | C | -1.401658 | 4.259782 | 2.382347  |
| C  | 5.154198  | 4.468632 | 7.619144  | H | -1.655621 | 5.182001 | 2.908145  |
| O  | 6.154707  | 3.848851 | 7.269906  | H | -0.701754 | 3.702155 | 3.009745  |
| C  | 4.062230  | 4.909636 | 6.780521  | N | -0.556465 | 4.702294 | 1.205507  |
| C  | 2.962069  | 5.563147 | 7.320137  | C | 0.663180  | 5.224578 | 1.482498  |
| N  | 1.456777  | 2.195518 | 0.246448  | N | 1.184455  | 5.695178 | 0.297498  |
| C  | 0.817018  | 1.912539 | 1.441844  | N | 0.399542  | 5.761367 | -2.060787 |
| N  | -0.423734 | 1.485393 | 1.120148  | H | 1.217357  | 6.813313 | -3.652912 |
| C  | -1.648032 | 0.930350 | -1.070253 | C | -0.631668 | 5.368556 | -2.941113 |
| O  | -2.636658 | 0.317272 | -0.665268 | O | -0.577524 | 5.615707 | -4.145567 |
| N  | -1.434132 | 1.167061 | -2.455470 | N | -1.703697 | 4.670591 | -2.383587 |
| H  | -3.460788 | 0.876745 | -2.896303 | H | -3.455047 | 3.624578 | -2.805890 |
| C  | -0.275228 | 1.694687 | -3.039429 | C | -1.924191 | 4.385039 | -0.999804 |
| O  | -0.163185 | 1.834620 | -4.256606 | O | -2.929012 | 3.780106 | -0.637177 |
| N  | 0.775999  | 2.068649 | -2.164696 | C | -0.831311 | 4.840885 | -0.170296 |
| H  | 1.913749  | 2.492979 | -3.850089 | C | 0.273133  | 5.475213 | -0.723912 |
| C  | 0.596186  | 1.925470 | -0.812141 | C | 7.094824  | 4.185470 | 4.443005  |
| C  | -0.584254 | 1.462191 | -0.266199 | H | 7.064719  | 5.265214 | 4.315581  |
| C  | -1.479022 | 1.171028 | 2.111798  | C | 4.627084  | 4.266102 | 4.241660  |
| H  | -0.982411 | 1.239514 | 3.085510  | H | 4.887117  | 5.174815 | 3.695678  |
| H  | -1.779413 | 0.133522 | 1.959080  | H | 3.923194  | 3.699665 | 3.626774  |
| C  | -2.664898 | 3.473209 | 2.156988  | N | 3.785103  | 4.740013 | 5.408659  |
| C  | -2.703330 | 2.067166 | 2.044755  | C | 2.568160  | 5.262688 | 5.120559  |
| C  | -3.947858 | 1.432558 | 1.929002  | N | 2.051075  | 5.764623 | 6.294516  |
| H  | -3.977025 | 0.351883 | 1.825462  | N | 2.839080  | 5.881730 | 8.649937  |
| C  | -5.139680 | 2.158058 | 1.940727  | H | 2.017023  | 6.957649 | 10.223492 |
| H  | -6.090849 | 1.638761 | 1.852412  | C | 3.870856  | 5.507154 | 9.537642  |

|   |          |          |           |   |           |           |           |
|---|----------|----------|-----------|---|-----------|-----------|-----------|
| O | 3.820819 | 5.784963 | 10.735596 | H | 2.959890  | 6.242751  | 1.221170  |
| N | 1.755405 | 2.269696 | 6.420766  | H | 3.142726  | 5.861148  | -0.504920 |
| C | 2.392630 | 1.953585 | 5.232293  | C | 0.347509  | 2.709044  | 6.452662  |
| N | 3.631302 | 1.527721 | 5.563646  | H | 0.241096  | 3.612559  | 7.048384  |
| C | 4.854866 | 1.022287 | 7.766508  | H | 0.061799  | 2.925037  | 5.423652  |
| O | 5.839506 | 0.393084 | 7.376989  | H | -0.290168 | 1.918815  | 6.850031  |
| N | 4.644402 | 1.297099 | 9.145166  | C | 0.731476  | 6.430851  | 6.342425  |
| H | 6.671379 | 1.020524 | 9.595519  | H | 0.849577  | 7.491608  | 6.560565  |
| C | 3.489258 | 1.846431 | 9.716553  | H | 0.284621  | 6.314361  | 5.355255  |
| O | 3.379768 | 2.020326 | 10.929531 | H | 0.090405  | 5.958232  | 7.085587  |
| N | 2.437858 | 2.200323 | 8.833683  | C | 5.990560  | 4.401309  | 9.960867  |
| H | 1.300082 | 2.662297 | 10.509154 | H | 6.508913  | 5.292753  | 10.323489 |
| C | 2.615495 | 2.021668 | 7.485082  | H | 5.528464  | 3.886194  | 10.803486 |
| C | 3.792992 | 1.538624 | 6.949976  | C | 1.755505  | 6.737469  | 9.191750  |
| C | 4.684045 | 1.183349 | 4.579225  | H | 1.696139  | 7.664839  | 8.622777  |
| H | 4.187317 | 1.232760 | 3.604421  | H | 0.799904  | 6.210962  | 9.171141  |
| H | 4.977464 | 0.147565 | 4.755492  | C | 5.706659  | 0.841761  | 10.069506 |
| C | 5.885134 | 3.476086 | 4.483568  | H | 5.620657  | 1.400533  | 10.997745 |
| C | 5.914371 | 2.072498 | 4.625277  | H | 5.595031  | -0.228097 | 10.270386 |
| C | 7.154859 | 1.432160 | 4.752575  | C | 1.189274  | 2.724254  | 9.429703  |
| H | 7.177039 | 0.353658 | 4.878400  | H | 1.044754  | 3.768720  | 9.146435  |
| C | 8.351471 | 2.149282 | 4.724289  | H | 0.338633  | 2.121680  | 9.112921  |
| H | 9.299293 | 1.625570 | 4.822030  | C | -2.755558 | 4.261630  | -3.341062 |
| C | 8.322358 | 3.537421 | 4.565974  | H | -3.270325 | 5.145726  | -3.726110 |
| H | 9.246333 | 4.109450 | 4.535202  | H | -2.294028 | 3.724678  | -4.170287 |
| C | 2.867062 | 2.626446 | 0.204884  | C | 1.483620  | 6.605491  | -2.619786 |
| H | 3.153717 | 2.864604 | 1.228721  | H | 1.548961  | 7.539647  | -2.062864 |
| H | 3.500552 | 1.823809 | -0.173907 | H | 2.437552  | 6.075866  | -2.597608 |
| H | 2.978292 | 3.515397 | -0.411519 | C | -2.496875 | 0.693570  | -3.370074 |
| C | 2.509365 | 6.349507 | 0.234574  | H | -2.415175 | 1.237784  | -4.307403 |
| H | 2.399466 | 7.408233 | 0.002368  | H | -2.382175 | -0.378920 | -3.554667 |

|   |          |          |           |
|---|----------|----------|-----------|
| C | 2.025772 | 2.576327 | -2.772194 |
| H | 2.173128 | 3.625913 | -2.510134 |
| H | 2.875100 | 1.977945 | -2.444090 |

**3-anti closed** (acetonitrile)

|    |           |           |           |   |           |          |           |
|----|-----------|-----------|-----------|---|-----------|----------|-----------|
|    |           |           |           | C | -2.162334 | 1.667543 | -3.963787 |
| Au | 1.494799  | 1.847794  | 3.204176  | H | 2.170971  | 3.807966 | -2.654646 |
| Au | 1.770386  | 4.959550  | 3.429082  | H | 3.199267  | 1.553476 | -2.192296 |
| N  | 4.436115  | 5.206546  | 9.500218  | H | -3.855280 | 4.287777 | -2.500744 |
| H  | 6.393085  | 4.910278  | 10.150746 | C | -1.581961 | 5.155856 | 2.497529  |
| C  | 4.888594  | 4.987511  | 8.171287  | H | -1.306134 | 6.019389 | 3.105996  |
| O  | 6.072457  | 4.739031  | 7.918449  | C | -1.783940 | 3.946613 | 3.399239  |
| C  | 3.816115  | 5.072171  | 7.218429  | N | -0.563812 | 5.027276 | 1.431967  |
| C  | 2.530337  | 5.419358  | 7.575383  | C | 0.770139  | 4.918042 | 1.632064  |
| N  | 1.477500  | 1.330836  | 0.225602  | N | 1.336868  | 4.813107 | 0.372105  |
| C  | 0.675500  | 1.668837  | 1.316108  | N | 0.443703  | 4.841086 | -1.964286 |
| N  | -0.553823 | 1.912310  | 0.807793  | H | 1.517175  | 5.052974 | -3.733593 |
| C  | -1.624026 | 1.813352  | -1.537649 | C | -0.742301 | 4.897589 | -2.737273 |
| O  | -2.807908 | 2.061882  | -1.284950 | O | -0.696838 | 4.807706 | -3.962343 |
| N  | -1.171692 | 1.592714  | -2.866361 | N | -1.948999 | 5.046366 | -2.036933 |
| H  | -3.128781 | 1.887824  | -3.517050 | H | -3.698753 | 6.058616 | -2.641645 |
| C  | 0.133422  | 1.273095  | -3.260168 | C | -2.102567 | 5.142421 | -0.634047 |
| O  | 0.420402  | 1.091266  | -4.441673 | O | -3.221047 | 5.281509 | -0.121896 |
| N  | 1.115316  | 1.185949  | -2.244237 | C | -0.852689 | 5.033740 | 0.062899  |
| H  | 2.542971  | 0.984951  | -3.741646 | C | 0.351238  | 4.900805 | -0.598428 |
| C  | 0.734463  | 1.383011  | -0.941562 | H | -2.515403 | 5.394301 | 1.982454  |
| C  | -0.551334 | 1.730440  | -0.584876 | H | -2.348361 | 2.956503 | 0.917216  |
| C  | -1.841130 | 2.199337  | 1.512855  | C | 5.106280  | 4.605827 | 5.120462  |
| C  | -1.826424 | 2.601246  | 2.968510  | H | 5.698322  | 5.518246 | 5.220680  |
| H  | -2.433344 | 1.286976  | 1.413114  | H | 5.613484  | 3.848483 | 5.715929  |
| H  | 2.749578  | -0.167055 | -2.402544 | N | 3.818847  | 4.892368 | 5.825515  |
| C  | 2.499458  | 0.862815  | -2.662176 | C | 2.589674  | 5.136924 | 5.317300  |
| H  | -2.195298 | 0.712219  | -4.491147 | N | 1.787608  | 5.473692 | 6.408117  |
| H  | -1.871704 | 2.460183  | -4.655995 | N | 2.149327  | 5.614769 | 8.878264  |
| H  | 2.411602  | 5.543984  | -2.276513 | H | 0.721252  | 5.813478 | 10.375650 |
| C  | 1.730274  | 4.806326  | -2.696671 | C | 3.131045  | 5.526116 | 9.894223  |

|   |           |           |           |   |           |          |           |
|---|-----------|-----------|-----------|---|-----------|----------|-----------|
| O | 2.843969  | 5.706718  | 11.075896 | H | 3.177062  | 4.349393 | 1.176744  |
| N | 1.929337  | 1.992865  | 6.261270  | H | 2.986377  | 3.831532 | -0.507829 |
| C | 2.495482  | 1.888847  | 5.000994  | C | 0.481616  | 2.176851 | 6.430584  |
| N | 3.829408  | 1.778218  | 5.200427  | H | 0.281158  | 2.972618 | 7.145706  |
| C | 5.368882  | 1.659203  | 7.265713  | H | 0.089816  | 2.462956 | 5.458667  |
| O | 6.487109  | 1.520308  | 6.752957  | H | 0.006293  | 1.251140 | 6.755763  |
| N | 5.215875  | 1.753398  | 8.668796  | C | 0.408510  | 5.974056 | 6.252691  |
| H | 6.965245  | 0.739455  | 9.271747  | H | 0.306915  | 6.939824 | 6.744981  |
| C | 4.009511  | 1.901821  | 9.369758  | H | 0.236857  | 6.095449 | 5.184367  |
| O | 3.964473  | 1.989952  | 10.594976 | H | -0.311592 | 5.261375 | 6.652807  |
| N | 2.823258  | 1.959982  | 8.597311  | C | 5.426649  | 5.130274 | 10.597651 |
| H | 1.749838  | 1.742593  | 10.366089 | H | 5.459759  | 6.085008 | 11.126069 |
| C | 2.915186  | 1.902403  | 7.231330  | H | 5.135798  | 4.336919 | 11.288946 |
| C | 4.118794  | 1.769443  | 6.569391  | C | 0.765152  | 5.937571 | 9.296415  |
| C | 4.846860  | 1.649672  | 4.134277  | H | 0.515449  | 6.967990 | 9.038594  |
| H | 5.780431  | 1.410235  | 4.648659  | H | 0.065298  | 5.247997 | 8.825031  |
| H | 4.570135  | 0.786746  | 3.525353  | C | 6.470180  | 1.695811 | 9.453345  |
| H | -2.191473 | 0.566824  | 3.559948  | H | 7.122742  | 2.510370 | 9.132836  |
| H | -2.763655 | 1.110521  | 5.907308  | H | 6.216541  | 1.798557 | 10.504546 |
| H | -2.770698 | 3.500716  | 6.647187  | C | 1.537052  | 1.994550 | 9.330378  |
| H | -2.128772 | 5.274992  | 5.052001  | H | 1.098858  | 2.994215 | 9.293120  |
| C | -2.116590 | 4.237342  | 4.731303  | H | 0.853768  | 1.260541 | 8.907092  |
| C | -2.487735 | 3.237838  | 5.631237  | C | -3.203081 | 5.102338 | -2.821976 |
| C | -2.489532 | 1.903745  | 5.217428  | H | -2.949023 | 4.998518 | -3.872966 |
| C | -2.152824 | 1.598907  | 3.899343  | C | 5.049273  | 2.859353 | 3.233236  |
| C | 2.856962  | 0.831596  | 0.381423  | C | 5.092087  | 4.204484 | 3.664618  |
| H | 3.028898  | 0.711738  | 1.449879  | C | 5.382281  | 2.569123 | 1.901138  |
| H | 2.959097  | -0.134758 | -0.109575 | C | 5.754192  | 3.568881 | 1.001807  |
| H | 3.576544  | 1.544205  | -0.019806 | C | 5.756433  | 4.902769 | 1.416259  |
| C | 2.784827  | 4.630412  | 0.203519  | C | 5.419317  | 5.207107 | 2.734355  |
| H | 3.258848  | 5.555248  | -0.125959 | H | 5.458242  | 6.239017 | 3.074237  |

|   |          |          |           |
|---|----------|----------|-----------|
| H | 6.031173 | 5.696214 | 0.726881  |
| H | 6.037359 | 3.306357 | -0.014178 |
| H | 5.394240 | 1.531612 | 1.579976  |

**4-trans** (gas-phase)

|    |           |          |           |   |           |          |           |
|----|-----------|----------|-----------|---|-----------|----------|-----------|
| Au | 0.095817  | 6.214027 | 11.368940 | O | 7.852296  | 6.446386 | 10.434909 |
| Cl | 0.110854  | 4.057910 | 12.316801 | C | 6.674673  | 6.166554 | 10.292296 |
| Cl | 0.078015  | 8.448743 | 10.639823 | H | 5.869615  | 7.088302 | 13.265554 |
| C  | -2.926875 | 7.536847 | 12.812107 | N | 5.680695  | 6.671729 | 11.193547 |
| H  | -3.314139 | 8.525839 | 12.563602 | H | 8.013756  | 4.265311 | 8.902950  |
| H  | -1.867888 | 7.624087 | 13.051952 | N | 6.226574  | 5.342205 | 9.244455  |
| H  | -3.460429 | 7.117528 | 13.666419 | C | 7.287502  | 4.849133 | 8.332613  |
| N  | -2.358588 | 5.326907 | 10.016765 | H | 2.011963  | 7.683220 | 13.059517 |
| C  | -1.937597 | 6.058585 | 11.064815 | H | 7.798234  | 5.699902 | 7.875522  |
| N  | -3.035926 | 6.639059 | 11.645659 | C | -3.747817 | 5.436572 | 9.902950  |
| C  | -4.175050 | 6.256058 | 10.930042 | C | -1.453967 | 4.565149 | 9.087643  |
| N  | -5.492730 | 6.574454 | 11.120835 | H | -2.124454 | 3.996114 | 8.440804  |
| H  | -5.605495 | 8.424979 | 12.160901 | H | -0.887328 | 3.869934 | 9.705897  |
| C  | 4.371097  | 6.331863 | 10.985182 | C | 0.828384  | 5.518743 | 8.274003  |
| C  | 3.971423  | 5.504058 | 9.953634  | C | -0.585340 | 5.504774 | 8.263936  |
| O  | 4.574479  | 4.237412 | 8.031029  | C | -1.266586 | 6.414607 | 7.434687  |
| H  | 6.804625  | 4.234042 | 7.575408  | H | -2.353289 | 6.387451 | 7.406853  |
| H  | 3.582365  | 7.163416 | 13.719790 | C | -0.584725 | 7.337006 | 6.648963  |
| H  | 5.766026  | 8.538344 | 12.207931 | H | -1.136878 | 8.030759 | 6.020563  |
| H  | 3.478120  | 8.577545 | 12.620076 | C | 0.814460  | 7.351300 | 6.659422  |
| C  | 4.887260  | 4.950759 | 8.982495  | H | 1.361639  | 8.056302 | 6.039213  |
| C  | 6.156772  | 7.522267 | 12.305040 | C | 1.503191  | 6.442461 | 7.454877  |
| C  | 3.077231  | 7.590125 | 12.851700 | H | 2.590516  | 6.437392 | 7.443022  |
| C  | -6.466038 | 6.052892 | 10.206345 | C | 1.703493  | 4.594661 | 9.108401  |
| O  | -7.650405 | 6.309893 | 10.335230 | H | 1.141687  | 3.889055 | 9.719287  |
| N  | -5.989685 | 5.240552 | 9.161549  | H | 2.392025  | 4.037928 | 8.469823  |
| H  | -7.750600 | 4.129637 | 8.792110  | N | 3.216157  | 6.697218 | 11.684608 |
| C  | -4.640888 | 4.870521 | 8.918156  | C | 2.135555  | 6.097385 | 11.090297 |
| O  | -4.303333 | 4.164066 | 7.970015  | N | 2.582796  | 5.371761 | 10.048870 |
| H  | 7.243212  | 7.547999 | 12.229614 | C | -7.029775 | 4.732063 | 8.234276  |
|    |           |          |           | H | -7.552360 | 5.575426 | 7.776931  |

|   |           |          |           |
|---|-----------|----------|-----------|
| H | -6.525701 | 4.131894 | 7.478910  |
| C | -5.998677 | 7.407955 | 12.232129 |
| H | -7.082748 | 7.434398 | 12.128171 |
| H | -5.737675 | 6.959402 | 13.193678 |



**4-cis open** (gas-phase)

|    |          |           |           |   |          |           |           |
|----|----------|-----------|-----------|---|----------|-----------|-----------|
|    |          |           |           | N | 7.230051 | 8.465900  | 14.206302 |
| Au | 4.921690 | 13.036793 | 16.261404 | H | 8.977072 | 7.385123  | 14.450775 |
| Cl | 4.220754 | 11.329111 | 17.719734 | C | 5.328134 | 16.386127 | 13.711872 |
| Cl | 4.272947 | 14.748644 | 17.738975 | N | 5.729855 | 18.519420 | 12.754072 |
| C  | 7.525428 | 10.853143 | 16.292660 | O | 7.706249 | 19.595696 | 13.214274 |
| H  | 8.538299 | 10.872059 | 15.890725 | H | 8.602522 | 15.127658 | 15.918786 |
| H  | 7.417588 | 10.066082 | 17.041576 | H | 7.483239 | 15.895852 | 17.097087 |
| H  | 7.301699 | 11.805869 | 16.769553 | H | 3.820363 | 15.555406 | 11.129473 |
| N  | 6.541814 | 10.655651 | 15.210729 | C | 3.442817 | 14.632245 | 13.586156 |
| C  | 5.444545 | 11.473061 | 15.034419 | O | 3.718800 | 17.445015 | 12.308304 |
| N  | 4.661104 | 10.917147 | 14.098988 | C | 7.588849 | 15.137745 | 16.318346 |
| C  | 5.233383 | 9.712261  | 13.665231 | H | 2.820133 | 15.496271 | 13.350103 |
| C  | 4.689266 | 8.681998  | 12.807233 | N | 4.723174 | 15.190620 | 14.126610 |
| O  | 3.592495 | 8.714543  | 12.253287 | N | 7.356818 | 17.570202 | 14.272499 |
| N  | 6.610467 | 15.382694 | 15.241330 | C | 6.977132 | 18.635667 | 13.389410 |
| H  | 7.358669 | 14.168021 | 16.756300 | C | 6.414794 | 9.553218  | 14.362818 |
| C  | 4.814411 | 17.441140 | 12.865476 | C | 3.396938 | 11.519110 | 13.567173 |
| C  | 3.858119 | 14.471206 | 11.129404 | H | 2.953041 | 12.066741 | 14.398331 |
| H  | 2.981793 | 14.087678 | 14.409961 | H | 2.749008 | 10.676530 | 13.321610 |
| H  | 9.118772 | 18.616063 | 14.557675 | C | 3.660865 | 13.786296 | 12.341882 |
| H  | 4.166748 | 11.842425 | 8.993726  | C | 3.638624 | 12.373530 | 12.333025 |
| C  | 4.038606 | 12.390624 | 9.923651  | C | 3.813196 | 11.698037 | 11.111794 |
| H  | 6.101316 | 19.799026 | 11.113377 | H | 3.740927 | 10.615645 | 11.098325 |
| C  | 4.061756 | 13.786816 | 9.932614  | C | 5.162370 | 6.451811  | 11.809709 |
| H  | 4.208289 | 14.342336 | 9.009812  | H | 5.091585 | 5.539134  | 12.406180 |
| C  | 6.513125 | 16.502372 | 14.412072 | H | 4.194847 | 6.707492  | 11.382041 |
| C  | 5.490930 | 14.598935 | 15.052967 | C | 8.560655 | 8.315975  | 14.834331 |
| N  | 5.574780 | 7.580511  | 12.680515 | H | 9.209859 | 9.147803  | 14.547861 |
| H  | 5.911455 | 6.307016  | 11.027954 | H | 8.472710 | 8.249115  | 15.920754 |
| C  | 6.819895 | 7.422447  | 13.310995 | C | 5.350491 | 19.669426 | 11.896187 |
| O  | 7.522647 | 6.445622  | 13.121473 | H | 4.374326 | 19.448298 | 11.468879 |

|   |          |           |           |
|---|----------|-----------|-----------|
| H | 5.310058 | 20.577548 | 12.502316 |
| C | 8.685474 | 17.681560 | 14.912445 |
| H | 8.590734 | 17.718804 | 15.999622 |
| H | 9.324335 | 16.848482 | 14.606549 |

**4-cis closed** (gas-phase)

|    |          |           |          |    |          |           |          |
|----|----------|-----------|----------|----|----------|-----------|----------|
|    |          |           |          | H  | 7.852619 | 7.437086  | 3.091349 |
| Au | 4.932919 | 4.723344  | 3.462104 | H  | 8.744350 | 6.243306  | 4.092870 |
| Cl | 4.147517 | 3.171225  | 1.877443 | C  | 3.457166 | 6.382362  | 6.268811 |
| C  | 5.594849 | 0.789917  | 7.402054 | H  | 3.476840 | 6.185088  | 7.342818 |
| N  | 7.454833 | 0.118482  | 5.262783 | H  | 2.955858 | 7.344164  | 6.141235 |
| N  | 5.115288 | 2.737239  | 5.786244 | C  | 2.716069 | 5.315114  | 5.501970 |
| N  | 6.546038 | 2.208155  | 4.204188 | C  | 1.704011 | 5.715044  | 4.615339 |
| C  | 5.580900 | 3.119224  | 4.584025 | H  | 1.539420 | 6.774906  | 4.441036 |
| C  | 5.764404 | 1.565329  | 6.192736 | C  | 0.922865 | 4.773909  | 3.945964 |
| C  | 6.655695 | 1.228490  | 5.193990 | H  | 0.155651 | 5.103513  | 3.251262 |
| C  | 7.274279 | 2.281697  | 2.920508 | Cl | 4.293389 | 6.578819  | 2.160438 |
| H  | 7.027264 | 3.232304  | 2.452819 | C  | 5.380687 | 8.371519  | 7.692177 |
| H  | 6.945148 | 1.483728  | 2.253622 | N  | 6.454712 | 9.243698  | 8.020308 |
| H  | 8.347808 | 2.222812  | 3.100266 | N  | 7.883497 | 8.507619  | 6.207263 |
| C  | 4.056135 | 3.433907  | 6.591249 | C  | 7.685536 | 9.352229  | 7.352989 |
| H  | 4.550101 | 4.231921  | 7.150154 | O  | 4.808687 | 1.044264  | 8.312147 |
| H  | 3.713862 | 2.691609  | 7.314235 | C  | 6.420274 | -1.219851 | 8.616075 |
| C  | 2.935930 | 3.936975  | 5.713541 | H  | 7.406085 | -1.248474 | 9.086068 |
| C  | 2.129984 | 3.000258  | 5.053164 | H  | 5.676295 | -0.813104 | 9.298494 |
| H  | 2.302855 | 1.938853  | 5.216824 | H  | 6.148504 | -2.230275 | 8.301964 |
| C  | 1.131752 | 3.410995  | 4.170946 | O  | 8.086598 | -1.696900 | 6.546824 |
| H  | 0.525271 | 2.671379  | 3.655942 | C  | 8.379781 | -0.325108 | 4.196415 |
| N  | 6.466081 | -0.329912 | 7.429566 | H  | 9.219084 | 0.368489  | 4.097310 |
| C  | 7.382495 | -0.709352 | 6.433334 | H  | 8.760051 | -1.298144 | 4.505042 |
| N  | 4.889677 | 6.620062  | 5.868840 | H  | 7.846584 | -0.424535 | 3.249221 |
| N  | 6.803718 | 6.738185  | 4.789603 | C  | 9.192130 | 8.608591  | 5.526739 |
| C  | 5.571026 | 6.115800  | 4.827598 | H  | 9.751614 | 9.382074  | 6.051780 |
| C  | 5.680143 | 7.581924  | 6.518685 | H  | 9.734996 | 7.662079  | 5.597591 |
| C  | 6.875608 | 7.659556  | 5.837007 | H  | 9.061809 | 8.902536  | 4.483157 |
| C  | 7.771144 | 6.530701  | 3.694233 | O  | 8.556763 | 10.120190 | 7.721076 |
| H  | 7.381193 | 5.734874  | 3.061359 | C  | 6.293726 | 10.132746 | 9.197197 |

|   |          |           |          |
|---|----------|-----------|----------|
| H | 6.410129 | 11.172514 | 8.883223 |
| H | 5.298631 | 9.957693  | 9.602207 |
| H | 7.061021 | 9.898542  | 9.939050 |
| O | 4.342952 | 8.315821  | 8.345710 |
